# Supplementary material for: Genomics-Driven Discovery of Benzoxazole Alkaloids from the Marine-Derived Micromonospora sp. SCSIO 07395
Source: MDPI journal article supplement (doi:10.3390/molecules28020821), 2023-01-13
Supplement: s1 [file s1]

# Supporting Information

## Genomics-Driven Discovery of Benzoxazole Alkaloids from the Marine-Derived *Micromonospora* sp. SCSIO 07395

Ziqian Cheng <sup>1,2,†</sup>, Qingbo Zhang <sup>1,2,3,4,†</sup>, Jing Peng <sup>1,2,†</sup>, Xiaoyang Zhao <sup>1,2</sup>, Liang Ma <sup>1,3</sup>,  
Changsheng Zhang <sup>1,2,3,4,\*</sup>  
and Yiguang Zhu <sup>1,2,3,4,\*</sup>

- <sup>1</sup> Key Laboratory of Tropical Marine Bio-Resources and Ecology, Guangdong Key Laboratory of Marine Materia Medica, South China Sea Institute of Oceanology, Innovation Academy for South China Sea Ecology and Environmental Engineering, Chinese Academy of Sciences, 164 West Xingang Road, Guangzhou 510301, China
- <sup>2</sup> University of Chinese Academy of Sciences, 19 Yuquan Road, Beijing 100049, China
- <sup>3</sup> Southern Marine Science and Engineering Guangdong Laboratory (Guangzhou), No.1119, Haibin Road, Nansha District, Guangzhou 511458, China
- <sup>4</sup> Sanya Institute of Ocean Eco-Environmental Engineering, Yazhou Scientific Bay, Sanya 572000, China
- \* Correspondence: czhang@scsio.ac.cn (C.Z.); ygzhu@scsio.ac.cn (Y.Z.); Tel.: +86-20-8902-3038 (C.Z. and Y.Z.)
- † These authors contribute equally to this work.

## Table of Contents

|                                                                                                              |    |
|--------------------------------------------------------------------------------------------------------------|----|
| Table S1. Deduced functions of individual <i>orfs</i> in the <i>mich</i> gene cluster .....                  | 3  |
| Table S2. Strains and plasmids used and generated in this study .....                                        | 4  |
| Table S3. Primers used in this study.....                                                                    | 5  |
| Table S4. The antibacterial activities of compound <b>1-6</b> (MIC, $\mu\text{g}\cdot\text{mL}^{-1}$ ) ..... | 6  |
| Figure S1 The representative biosynthetic pathway of benzoxazole .....                                       | 7  |
| Figure S2. The spectroscopic data of <b>1</b> .....                                                          | 8  |
| Figure S3. The spectroscopic data of <b>2</b> .....                                                          | 15 |
| Figure S4. The spectroscopic data of <b>3</b> .....                                                          | 23 |
| Figure S5. The spectroscopic data of <b>4</b> .....                                                          | 30 |
| Figure S6. The spectroscopic data of <b>5</b> .....                                                          | 37 |
| Figure S7. The spectroscopic data of <b>6</b> .....                                                          | 45 |
| References.....                                                                                              | 52 |

**Table S1.** Deduced functions of individual *orfs* in the *mich* gene cluster

| Gene         | Size (aa) | Proposed protein function                       | Orthologue in A33853 cluster (% deduced protein identity) | Orthologue in caboxamycin cluster (% deduced protein identity) | Orthologue in nataxazole cluster (% deduced protein identity) |
|--------------|-----------|-------------------------------------------------|-----------------------------------------------------------|----------------------------------------------------------------|---------------------------------------------------------------|
| <i>orf-2</i> | 381       | Probable acyl-CoA dehydrogenase                 |                                                           |                                                                |                                                               |
| <i>orf-1</i> | 188       | Siroheme synthase                               |                                                           |                                                                |                                                               |
| <i>michA</i> | 494       | amidohydrolase                                  | <i>bomN</i> (60%)                                         | <i>cbxE</i> (58%)                                              | <i>natAM</i> (60%)                                            |
| <i>michB</i> | 254       | 2,3-dihydro-2,3-dihydroxybenzoate dehydrogenase | <i>bomO</i> (61%)                                         | <i>cbxG</i> (63%)                                              | <i>natDB</i> (61%)                                            |
| <i>michC</i> | 215       | Isochorismatase                                 | <i>bomP</i> (55%)                                         | <i>cbxH</i> (63%)                                              | <i>natIS</i> (59%)                                            |
| <i>michD</i> | 659       | Anthranilate synthase                           | <i>bomQ</i> (64%)                                         | <i>cbxI</i> (58%)                                              | <i>natAN</i> (57%)                                            |
| <i>michE</i> | 427       | coenzyme A ligase                               | <i>bomJ</i> (64%)                                         | <i>cbxC</i> (57%)                                              | <i>NatL2</i> (63%)                                            |
| <i>michF</i> | 349       | O-methyltransferase                             |                                                           |                                                                |                                                               |
| <i>michR</i> | 224       | YdeI/OmpD-associated family protein             |                                                           |                                                                |                                                               |
| <i>orf1</i>  | 140       | 50S ribosomal protein                           |                                                           |                                                                |                                                               |
| <i>orf2</i>  | 275       | Arylamine N-acetyltransferase                   |                                                           |                                                                |                                                               |
| <i>orf3</i>  | 522       | aldehyde dehydrogenase                          |                                                           |                                                                |                                                               |
| <i>orf4</i>  | 177       | SRPBCC family protein                           |                                                           |                                                                |                                                               |
| <i>orf5</i>  | 341       | ketoacyl-ACP synthase III family protein        |                                                           |                                                                |                                                               |
| <i>michG</i> | 362       | DAHPh synthase                                  |                                                           |                                                                |                                                               |
| <i>orf6</i>  | 776       | non-ribosomal peptide synthetase                |                                                           |                                                                |                                                               |

**Table S2.** Strains and plasmids used and generated in this study

| Strains/Plasmids                      | Characteristics                                                                    | Sources    |
|---------------------------------------|------------------------------------------------------------------------------------|------------|
| <b><i>Escherichia coli</i></b>        |                                                                                    |            |
| DH10B                                 | Host strain for BAC library construction                                           | Giboco BRL |
| ET12567/pUB307                        | Host strain for conjugation                                                        | 4 1        |
| <b><i>Actinomycetes</i></b>           |                                                                                    |            |
| <i>Micromonospora</i> sp. SCSIO 07395 | Wild type                                                                          | This study |
| <i>S. albus</i> J1074                 | Host strain for heterologous expression                                            | 3 2        |
| <i>S. albus</i> Del14                 | Host strain for heterologous expression                                            | 13         |
| <i>S. albus</i> J1074/pMSBBAC2        | <i>S. albus</i> J1074 containing plasmid pMSBBAC2                                  | This study |
| <i>S. albus</i> J1074/pCSG8103        | <i>S. albus</i> J1074 containing plasmid pCSG8103                                  | This study |
| <i>S. albus</i> Del14/pMSBBAC2        | <i>S. albus</i> Del14 containing plasmid pMSBBAC2                                  | This study |
| <i>S. albus</i> Del14/pCSG8103        | <i>S. albus</i> Del14 containing plasmid pCSG8103                                  | This study |
| <b>Plasmids</b>                       |                                                                                    |            |
| pMSBBAC2                              | Apr <sup>r</sup> , the vector for BAC library construction                         | 2 4        |
| pCSG8103                              | Apr <sup>r</sup> , BAC plasmid containing entire microechmycin ( <i>mich</i> ) BGC | This study |

**Table S3.** Primers used in this study

|      |                           |
|------|---------------------------|
| 8-F1 | CGTCGTCCGGCCACCCATTGATA   |
| 8-R1 | CCCCCGGCCGCATTACTGTGAA    |
| 8-F2 | GCCACCGCAGTCCACCGTCATTTC  |
| 8-R2 | CCAGGGCCCCGGATCAGGTTGTTCA |

**Table S4.** The antibacterial activities of compound **1-6** (MIC,  $\mu\text{g}\cdot\text{mL}^{-1}$ )

| Compounds     | <i>S. aureus</i> ATCC 29213 | <i>M. luteus</i> SCSIO ML01 | <i>E. coli</i> ATCC 25922 | <i>V. alginolyticus</i> 13214 | <i>A.baumannii</i> ATCC 19606 | <i>K. pneumoniae</i> ATCC 13883 |
|---------------|-----------------------------|-----------------------------|---------------------------|-------------------------------|-------------------------------|---------------------------------|
| <b>1</b>      | >64                         | 8                           | >64                       | >64                           | >64                           | >64                             |
| <b>2</b>      | >64                         | >64                         | >64                       | >64                           | >64                           | >64                             |
| <b>3</b>      | >64                         | >64                         | 64                        | >64                           | >64                           | >64                             |
| <b>4</b>      | >64                         | >64                         | >64                       | >64                           | >64                           | >64                             |
| <b>5</b>      | >64                         | >64                         | >64                       | >64                           | >64                           | >64                             |
| <b>6</b>      | >64                         | >64                         | >64                       | >64                           | >64                           | >64                             |
| Ciprofloxacin | 0.25                        | 1                           | 0.0125                    | 0.03                          | 0.125                         | 0.03                            |

Note: Ciprofloxacin is a positive control.

**Figure S1** The representative biosynthetic pathway of benzoxazole

(A) The biosynthesis of A33853

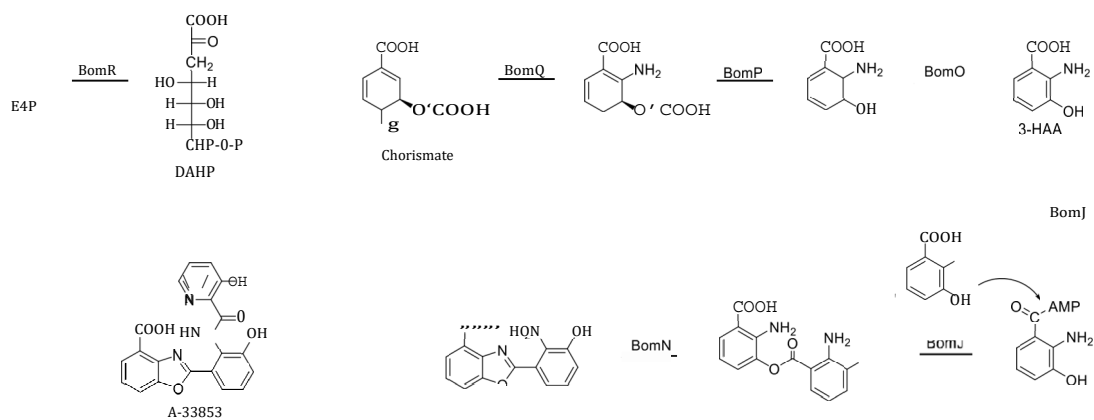

(B) The biosynthesis of nataxazole

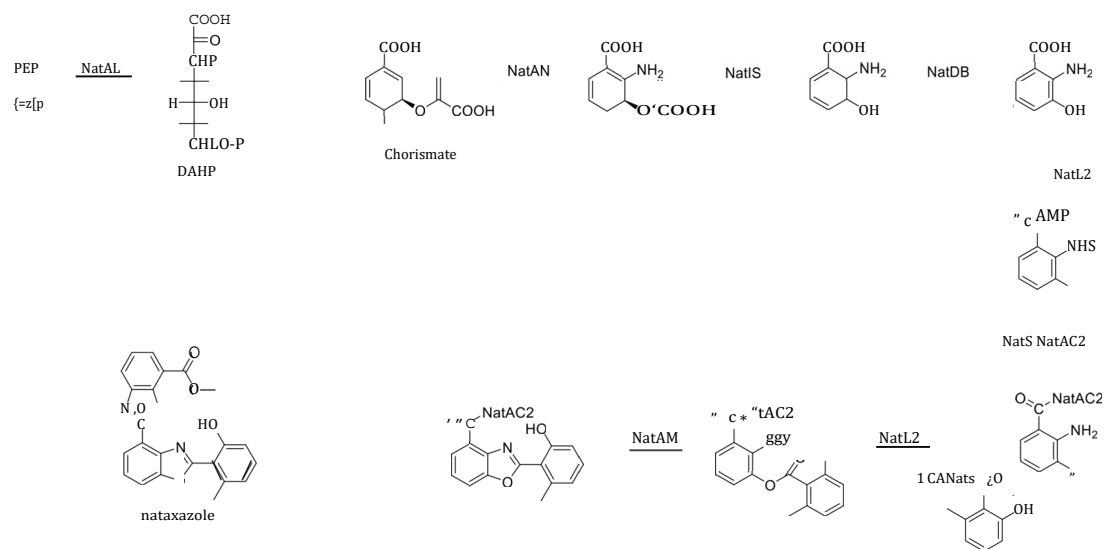

(C) The biosynthesis of caboxamycin

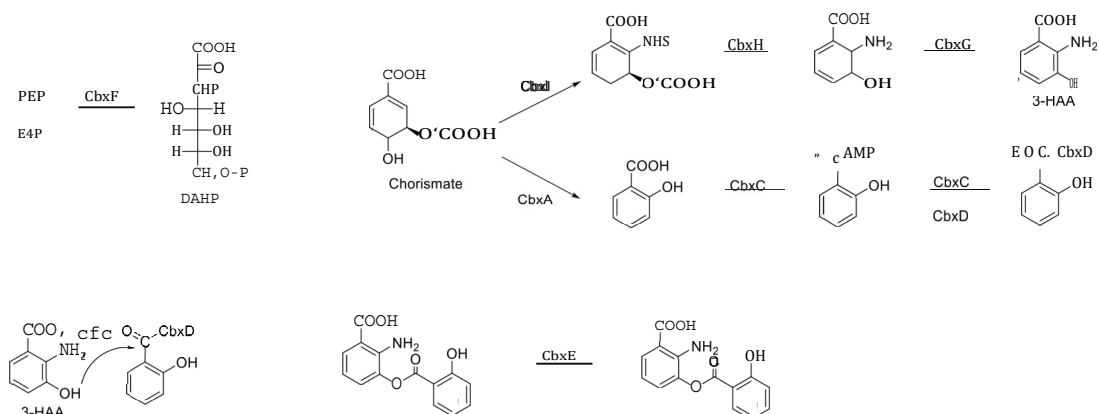

**Figure S2.** The spectroscopic data of **1**

**(A)** The HRESIMS (a) UV (b) spectrum of **1**

(a)

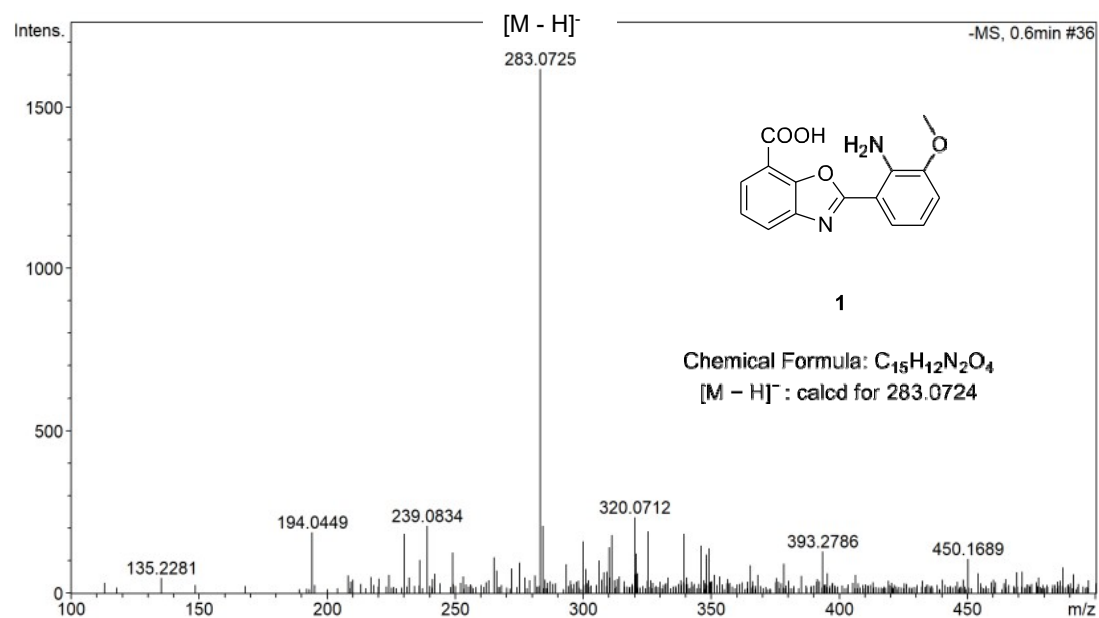

(b)

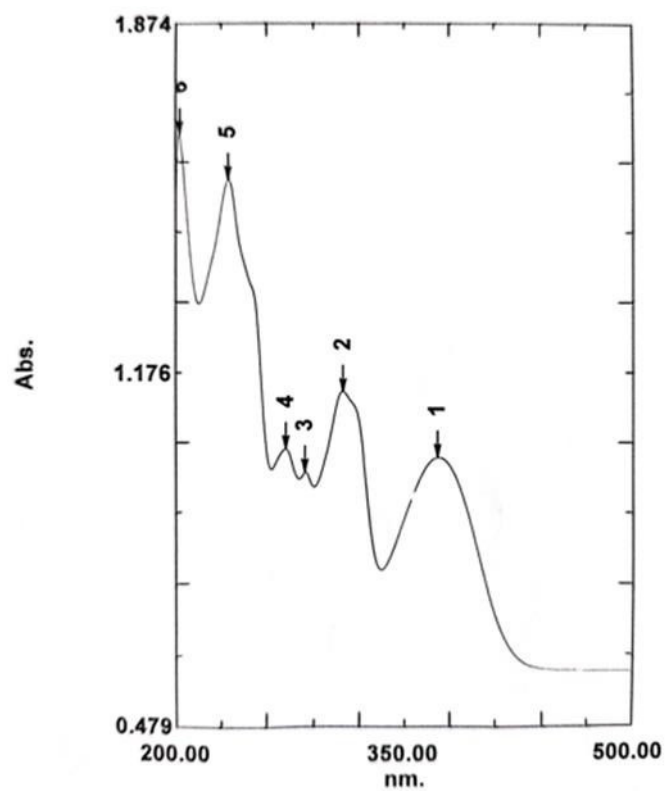



**Figure S2.** The spectroscopic data of **1**

(B) The  $^1\text{H}$ -NMR spectrum of **1** (700 MHz for  $^1\text{H}$  NMR in  $\text{DMSO}-d_6$ )

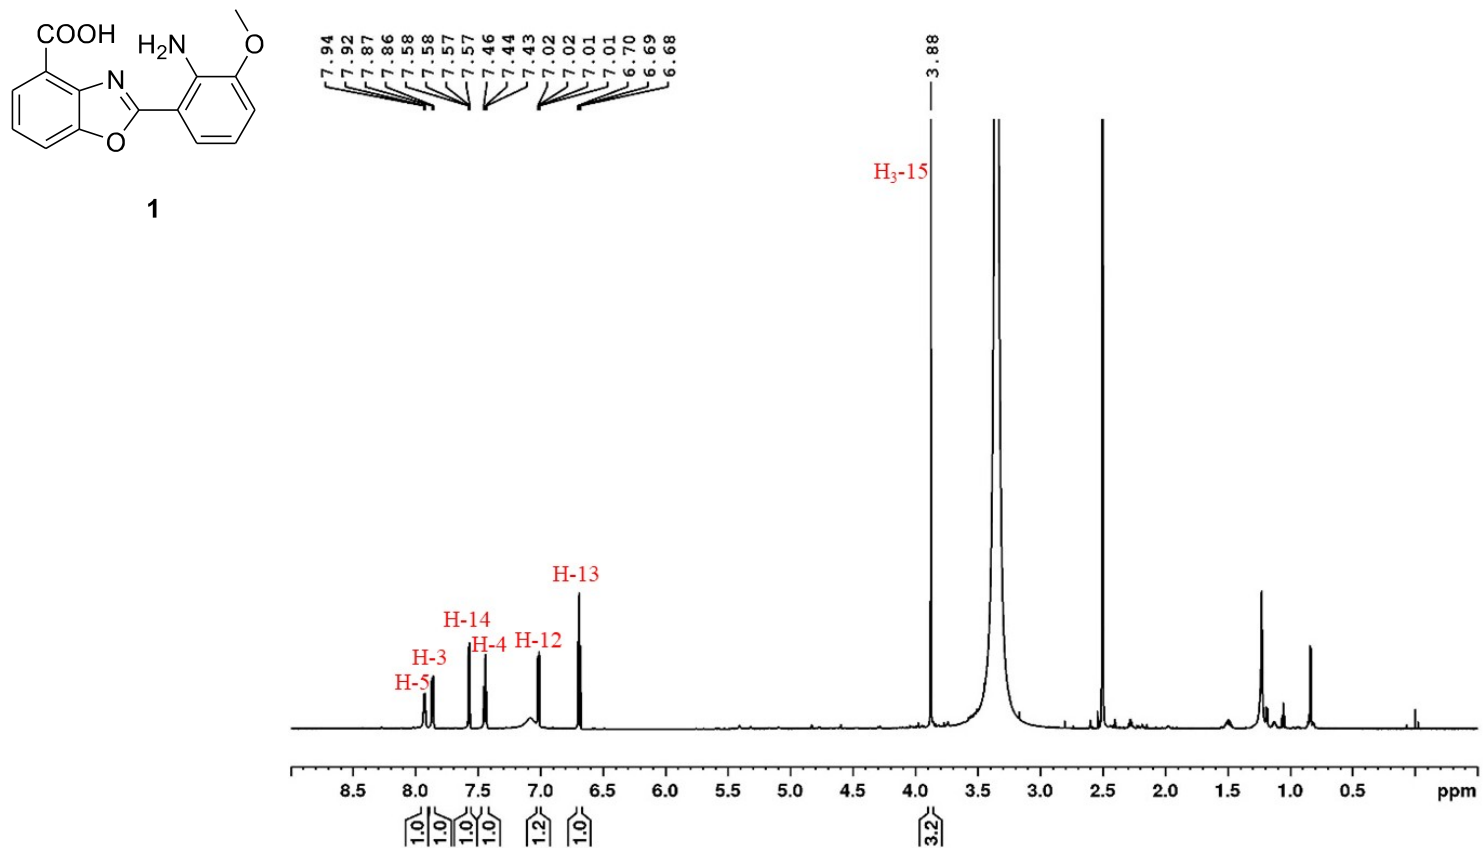

**Figure S2.** The spectroscopic data of **1**

(C) The  $^{13}\text{C}$ -NMR spectrum of compound **1** in  $\text{DMSO-}d_6$  (175 MHz)

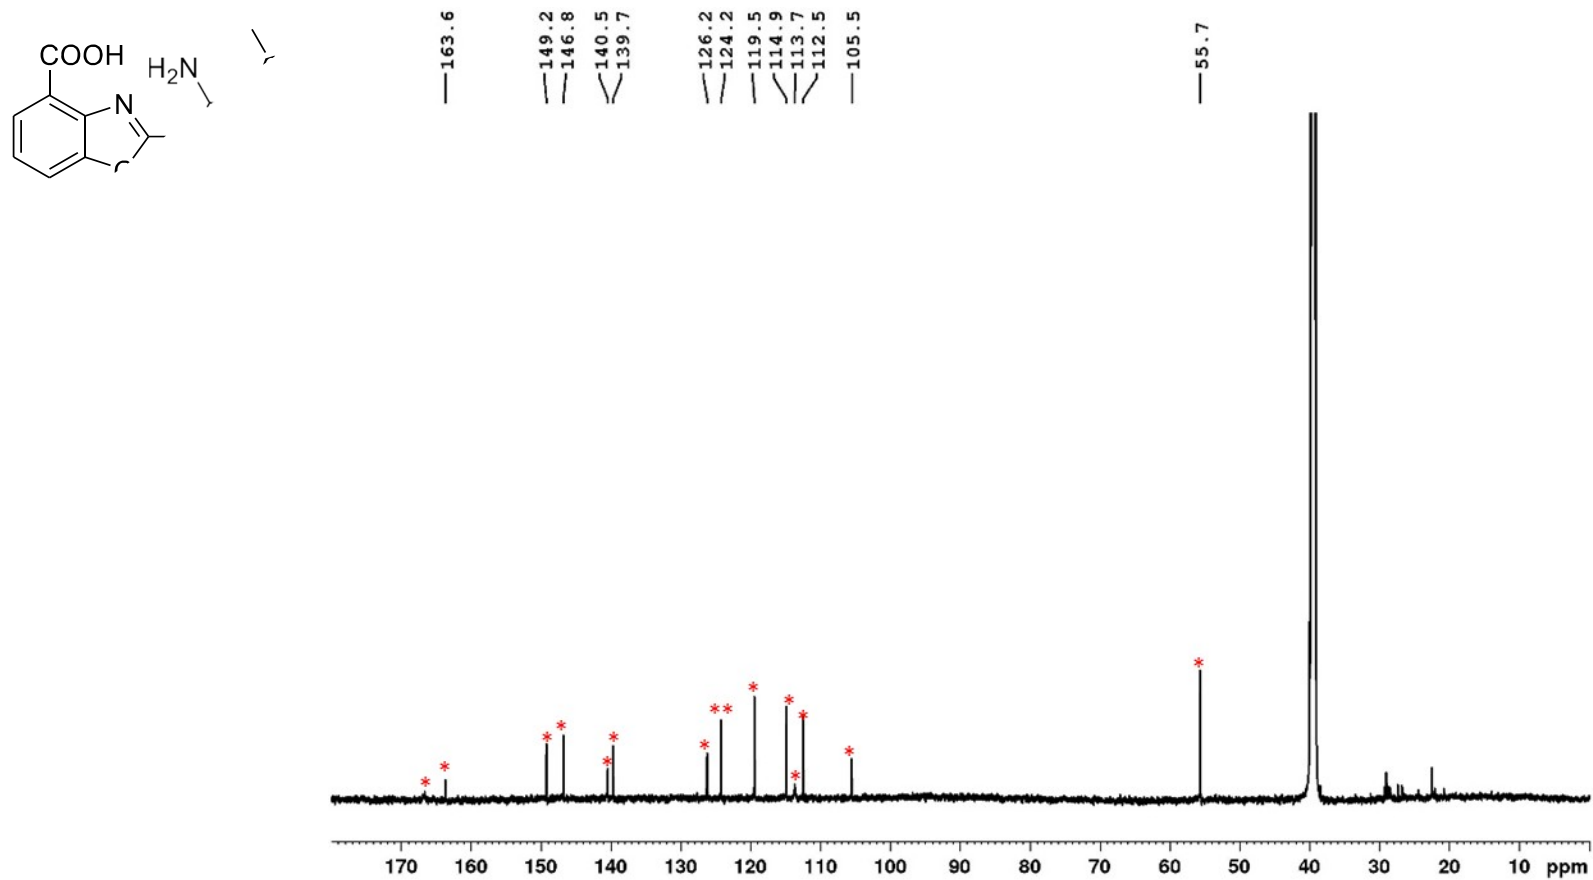

**Figure S2.** The spectroscopic data of **1**  
(D) The DEPT135 spectrum of **1** (175MHz, DMSO-*d*<sub>6</sub>)

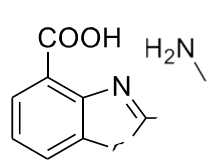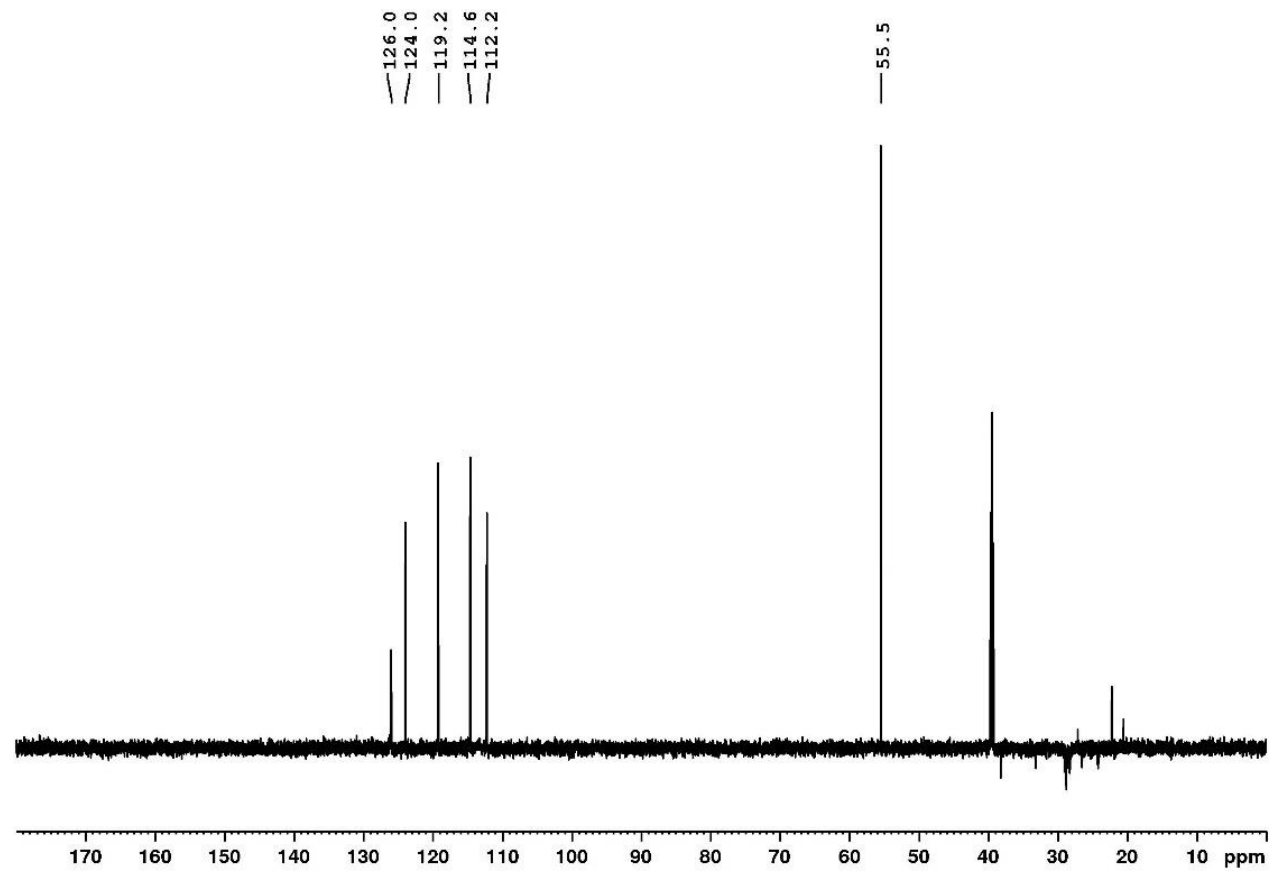

**Figure S2.** The spectroscopic data of **1**  
**(E)** The HSQC spectrum of compound **1**

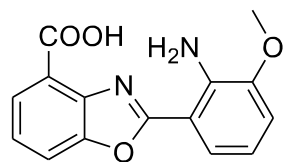

**1**

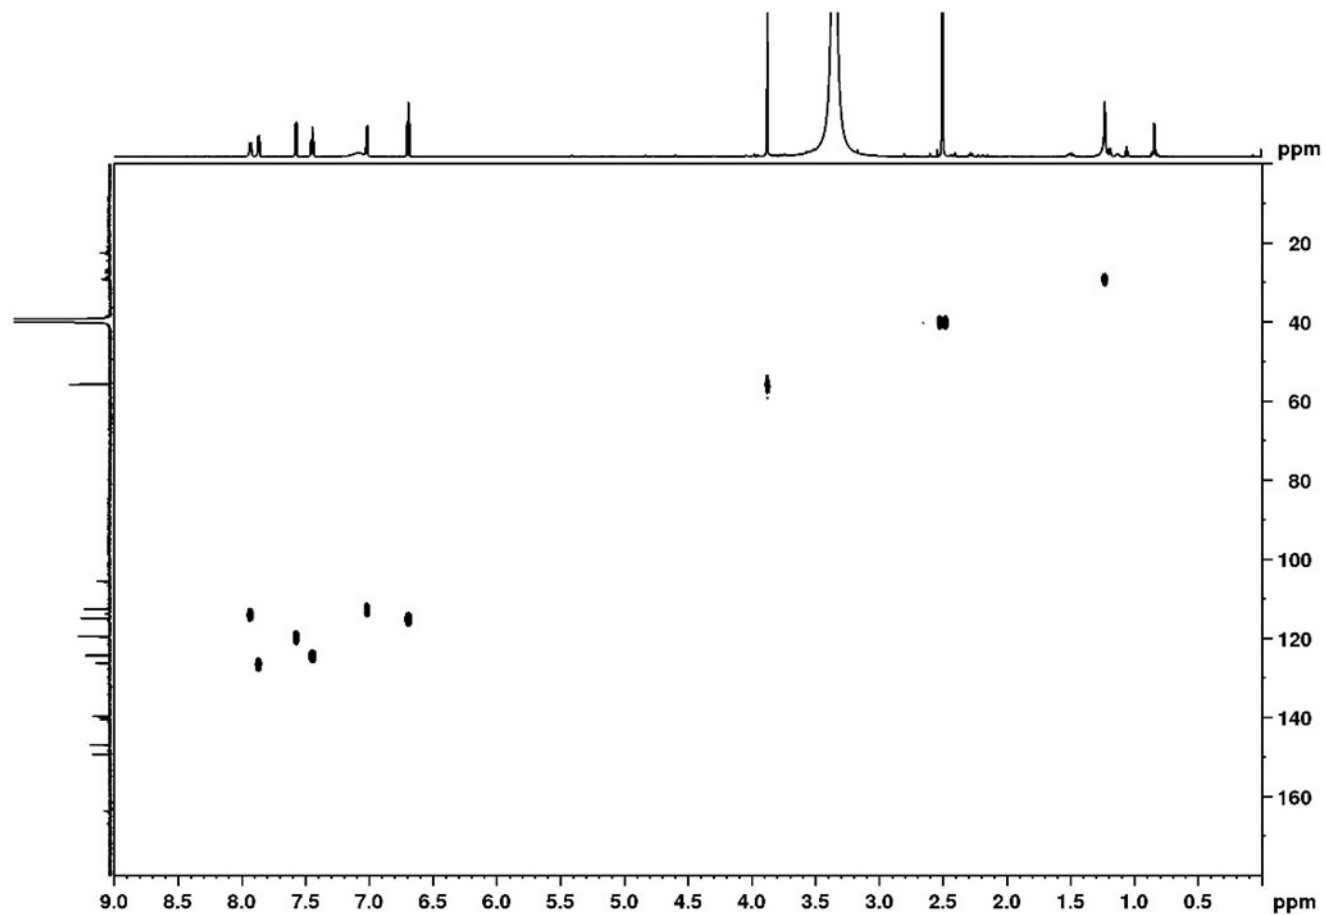

**Figure S2.** The spectroscopic data of **1**  
**(F)** The HMBC spectrum of **1**

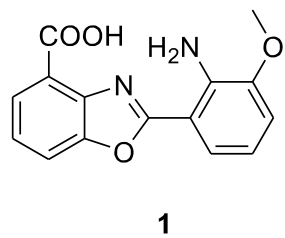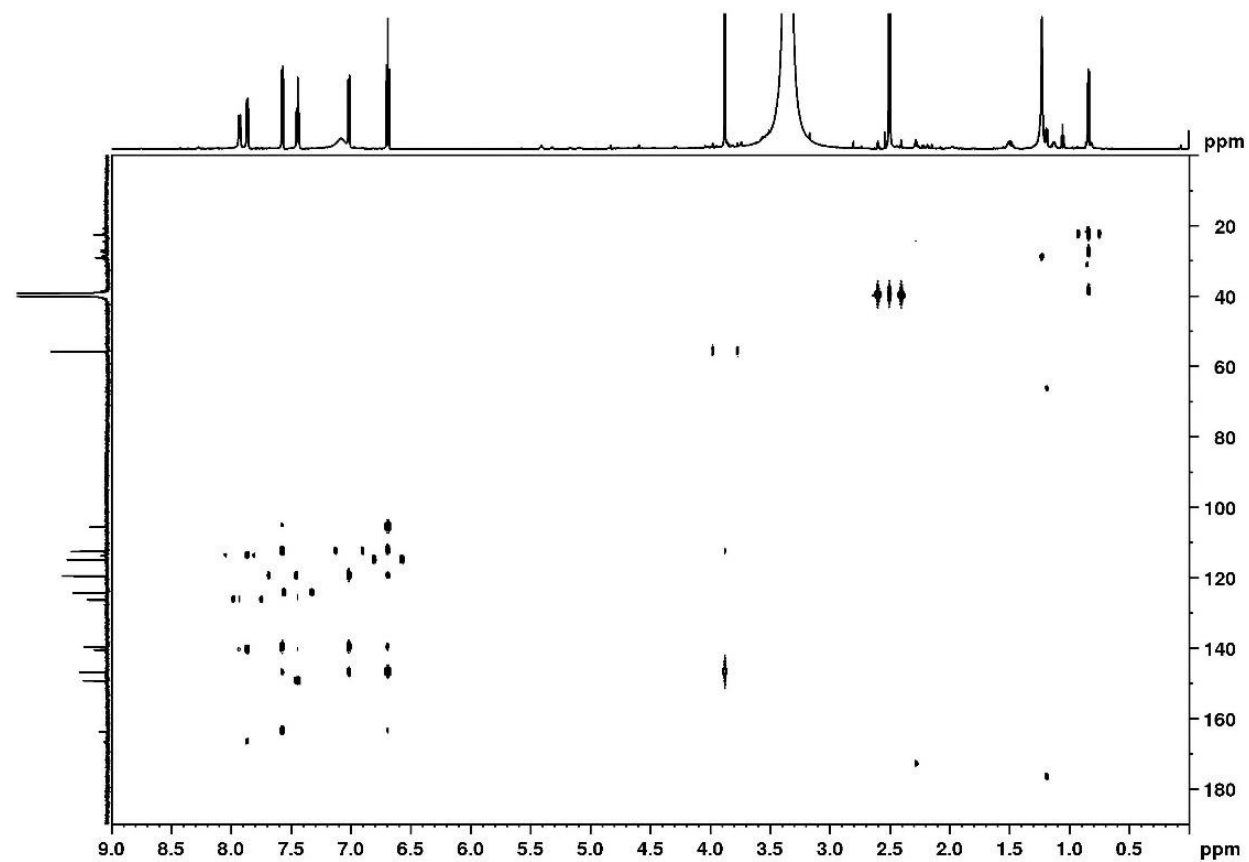

**Figure S2.** The spectroscopic data of **1**  
**(G)** The  $^1\text{H}$ - $^1\text{H}$  COSY spectrum of **1**

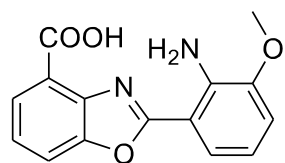

**1**

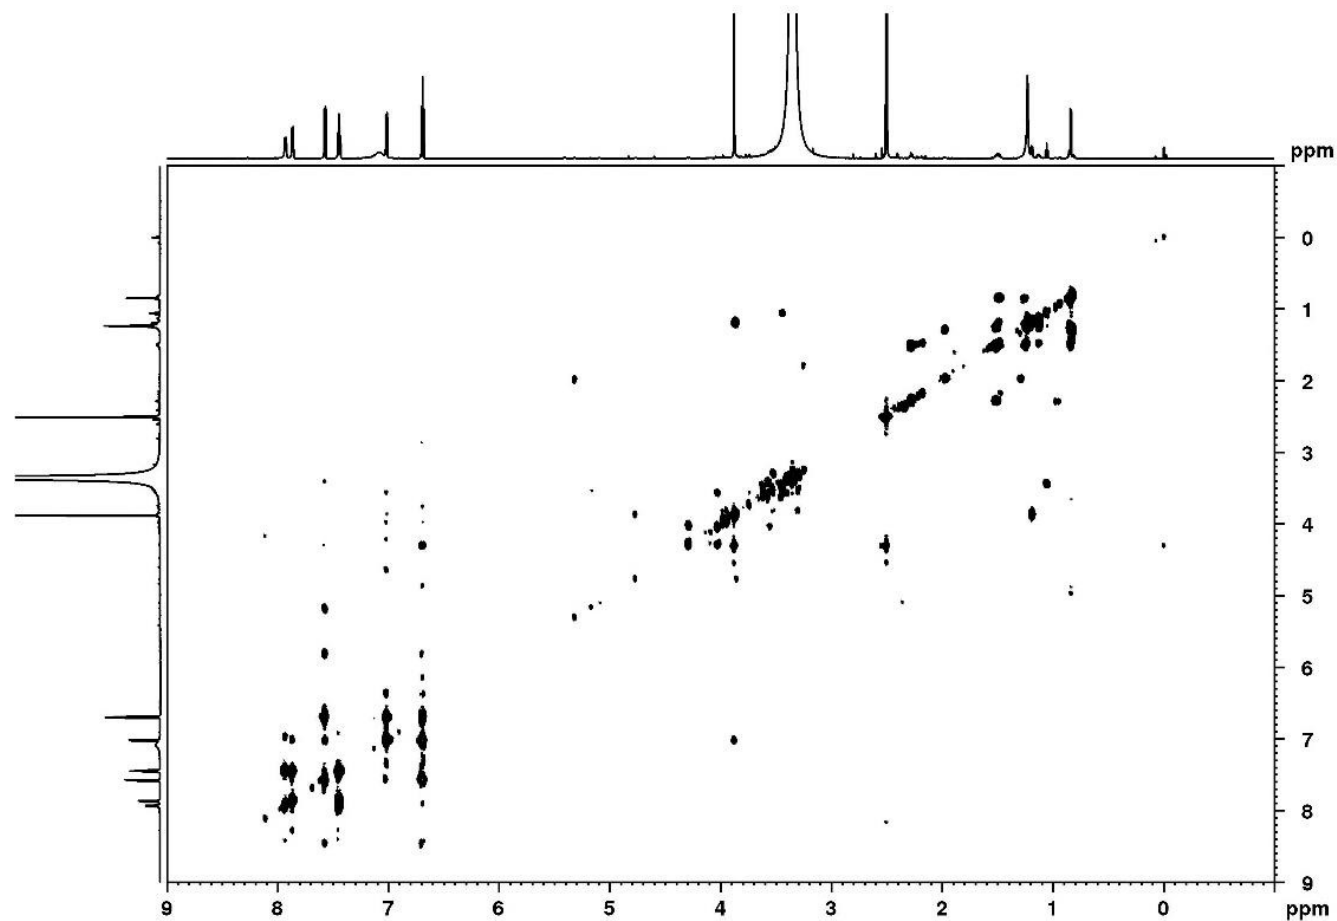

**Figure S3.** The spectroscopic data of **2**

(A) The HRESIMS (a), UV (b), CD (c) spectrum and chiral HPLC analysis (d) of **2**

(a)

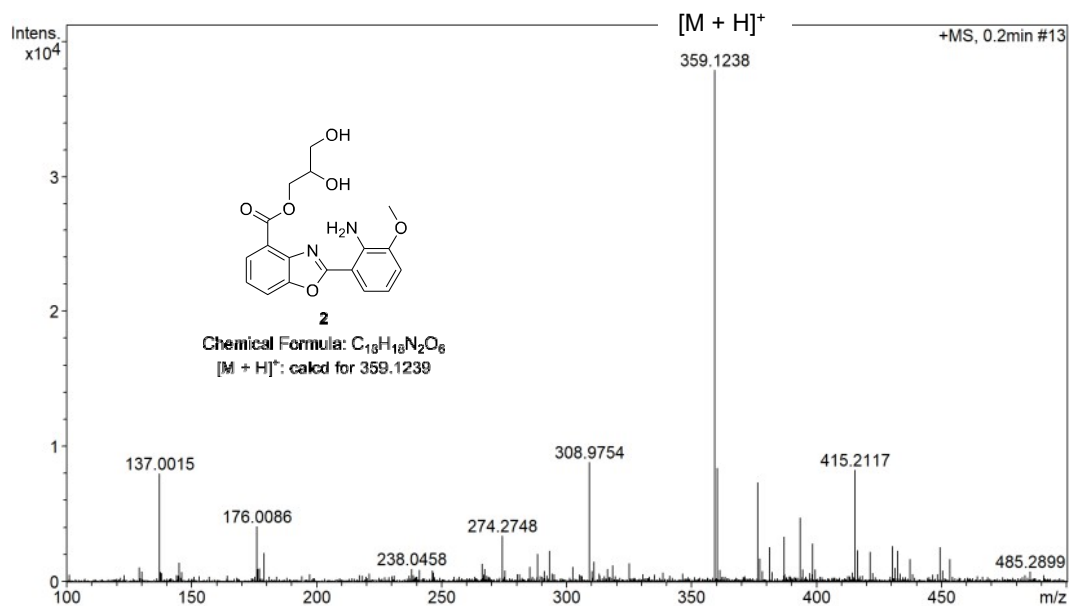

(b)

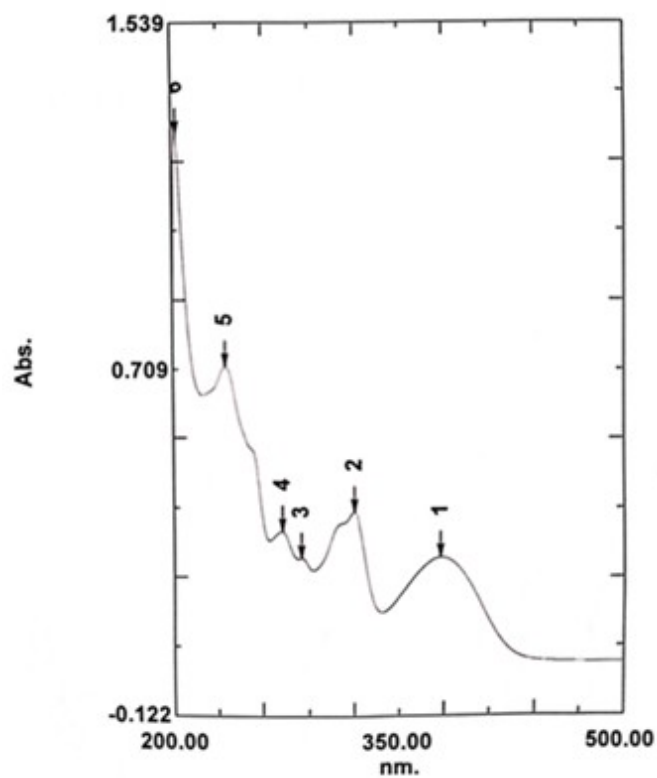

(c)

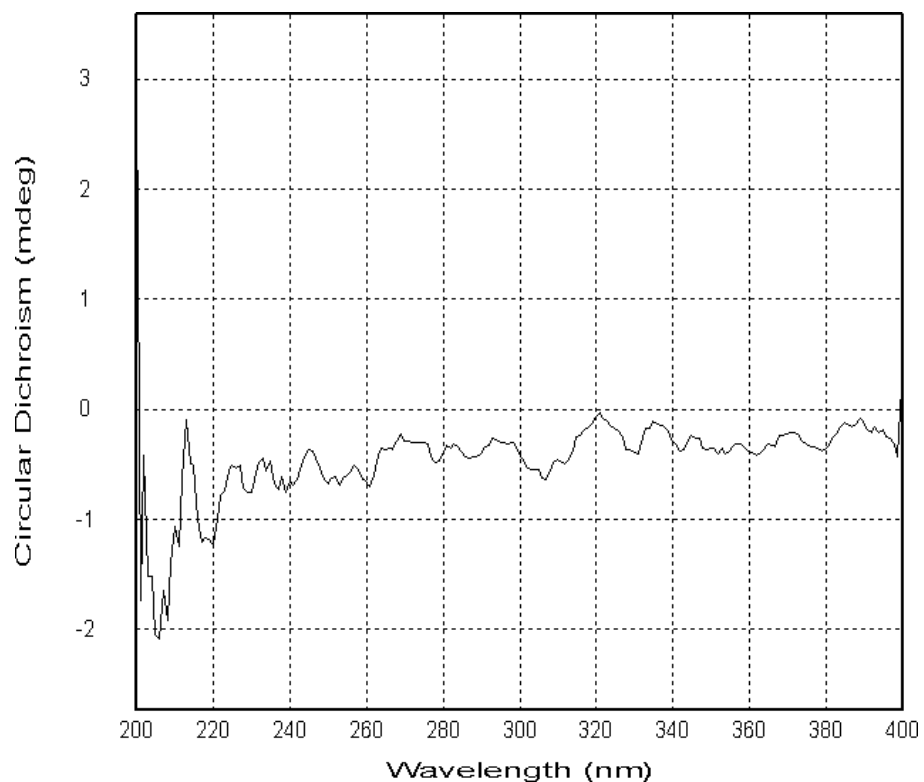

(d) Chiral HPLC analysis of compound 2

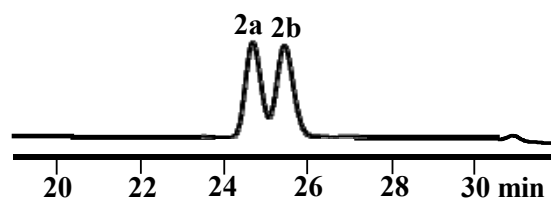

Chiral HPLC analysis of compound **2** was conducted by using a chiral column (Lux Cellulose-3, 5  $\mu\text{m}$ , 250  $\times$  4.6 mm, phenomenex) with UV detection at 265 nm under the following program: solvent system (solvent A, 10%  $\text{CH}_3\text{CN}$  in water; solvent B, 90%  $\text{CH}_3\text{CN}$  in water); 38% B (0–35 min), flow rate at 1  $\text{mL min}^{-1}$ .



**Figure S3.** The spectroscopic data of **2**

(B) The  $^1\text{H}$ -NMR spectrum of **2** (700 MHz for  $^1\text{H}$  NMR in  $\text{DMSO}-d_6$ )

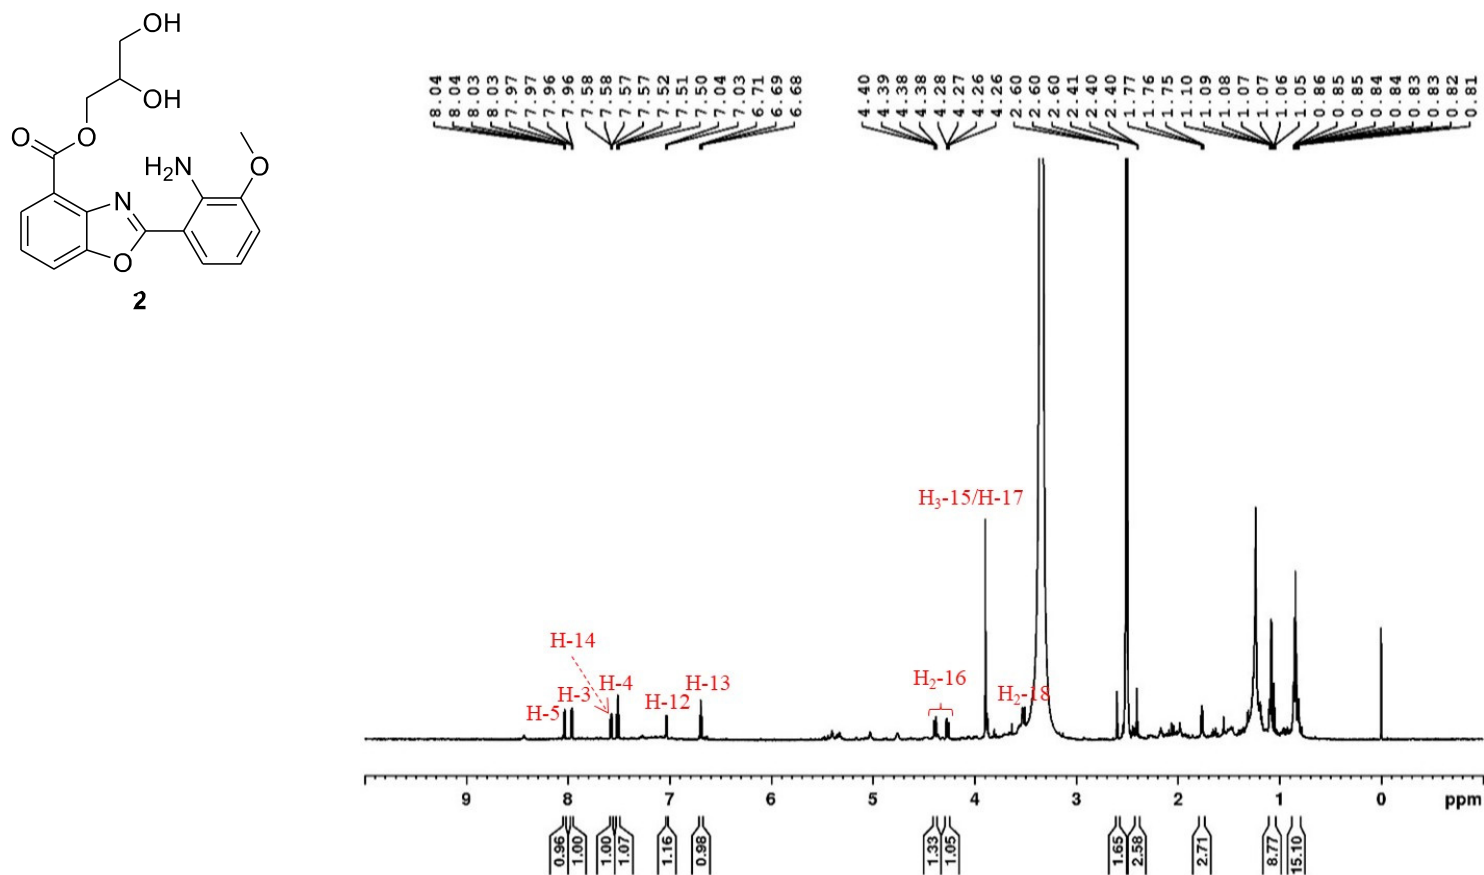

**Figure S3.** The spectroscopic data of **2**

(C) The  $^{13}\text{C}$  NMR spectrum of compound **2** in  $\text{DMSO-}d_6$  (175 MHz)

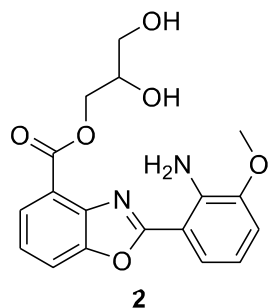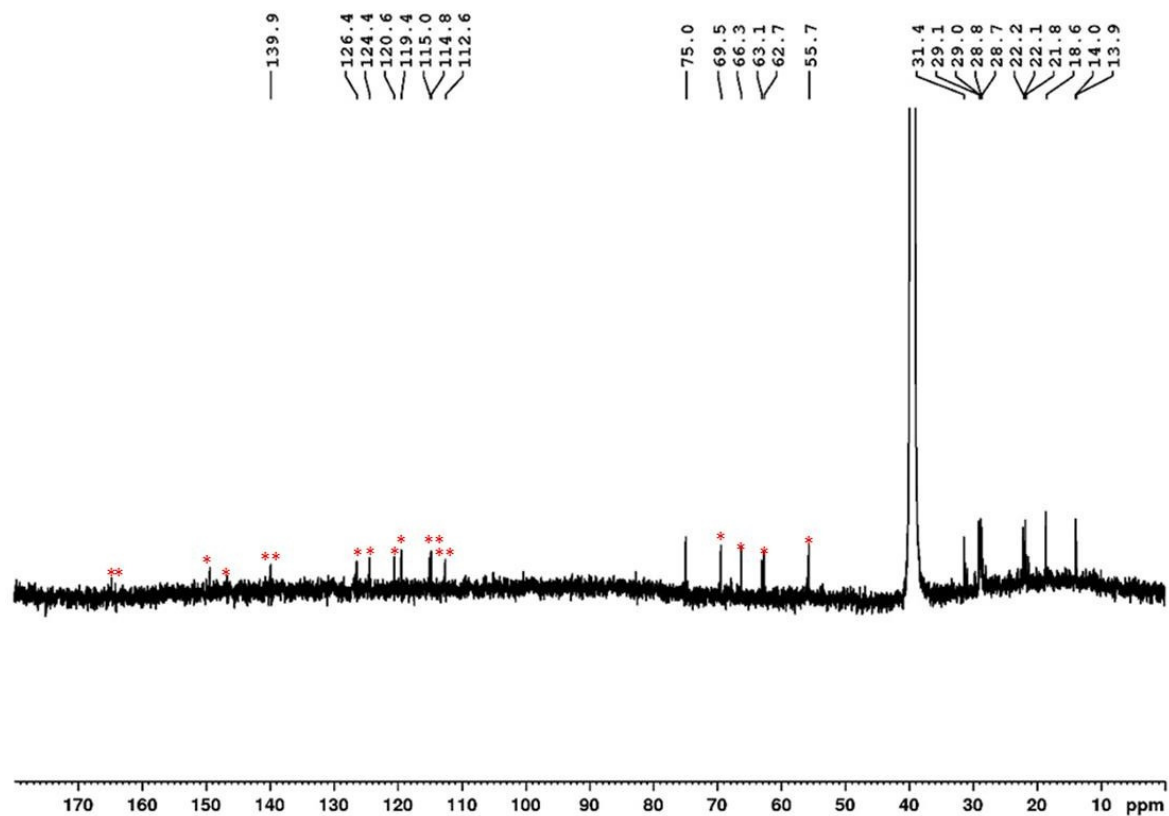

**Figure S3.** The spectroscopic data of **2**  
**(D)** The DEPT135 spectrum of **2**

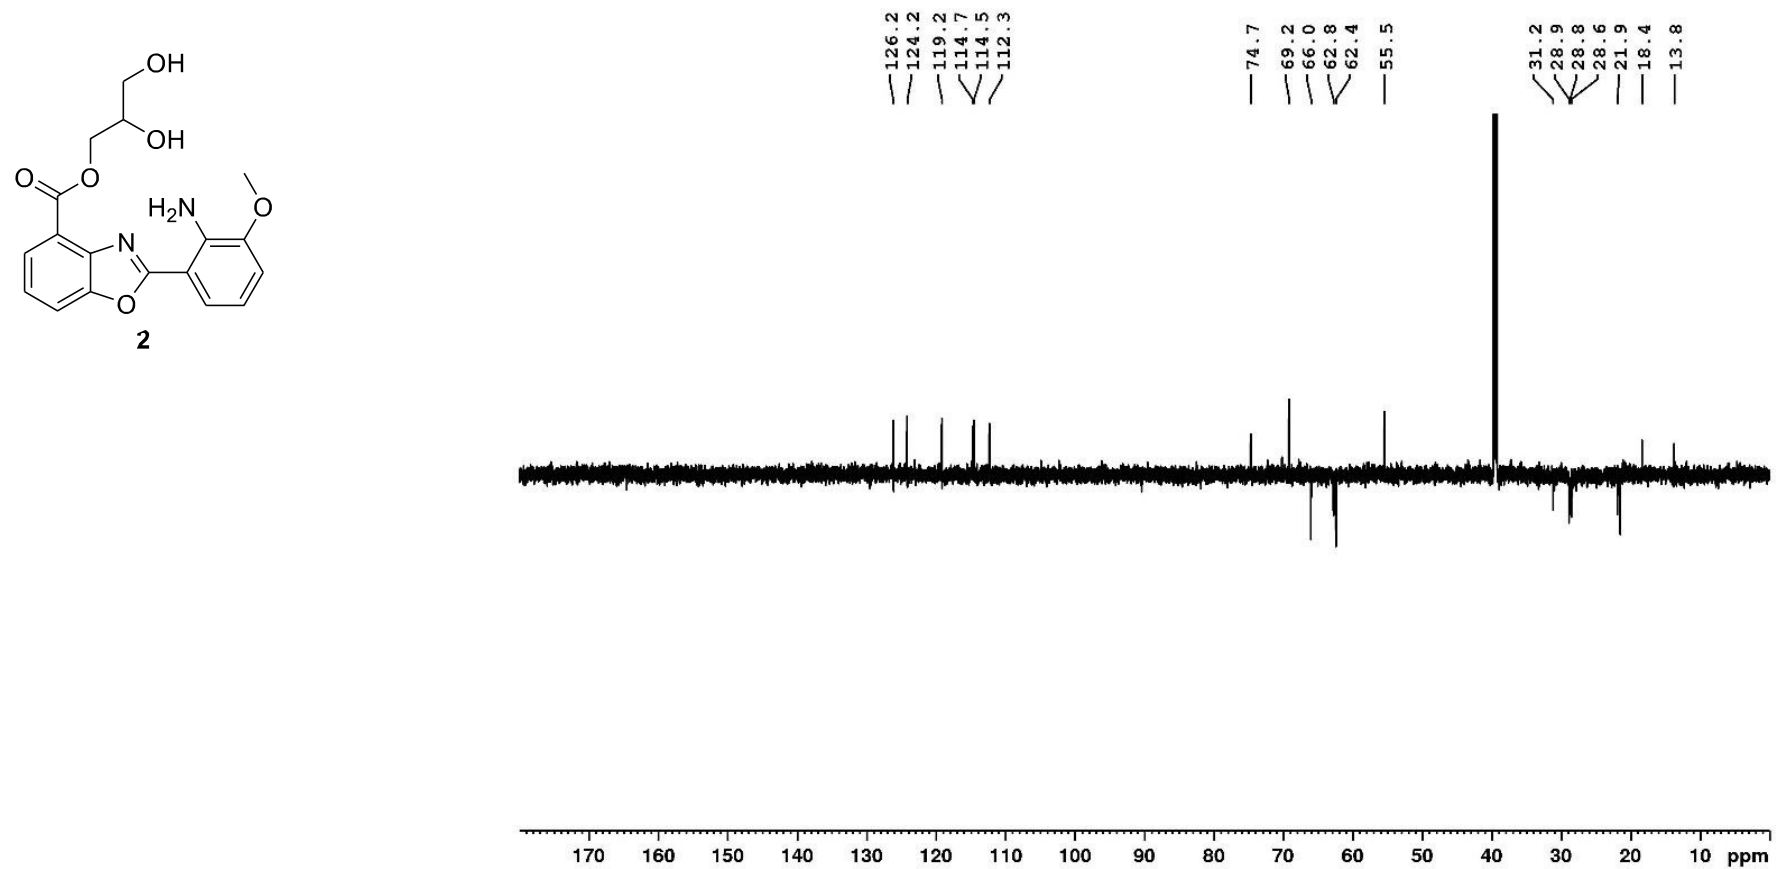

**Figure S3.** The spectroscopic data of **2**  
**(E)** The HSQC spectrum of compound **2**

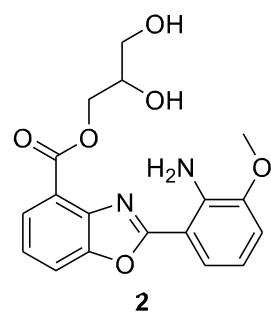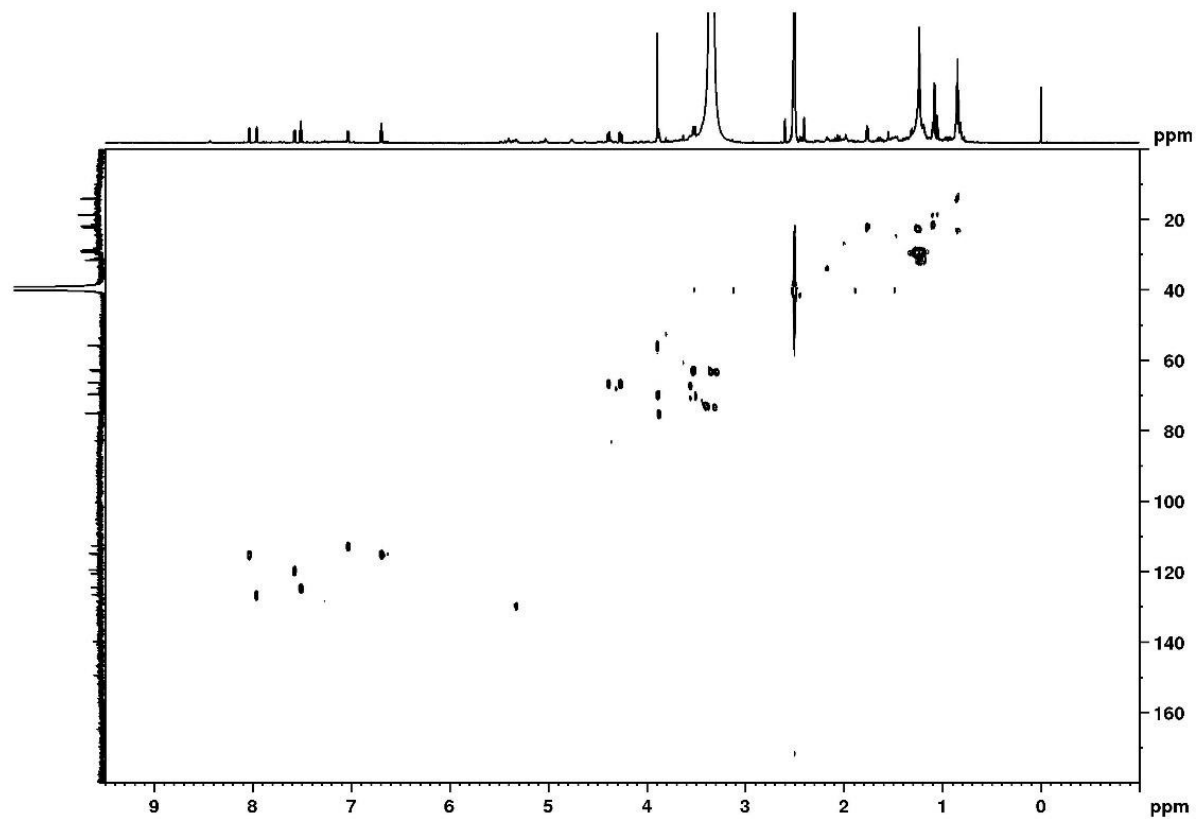

**Figure S3.** The spectroscopic data of **2**  
**(F)** The HMBC spectrum of **2**

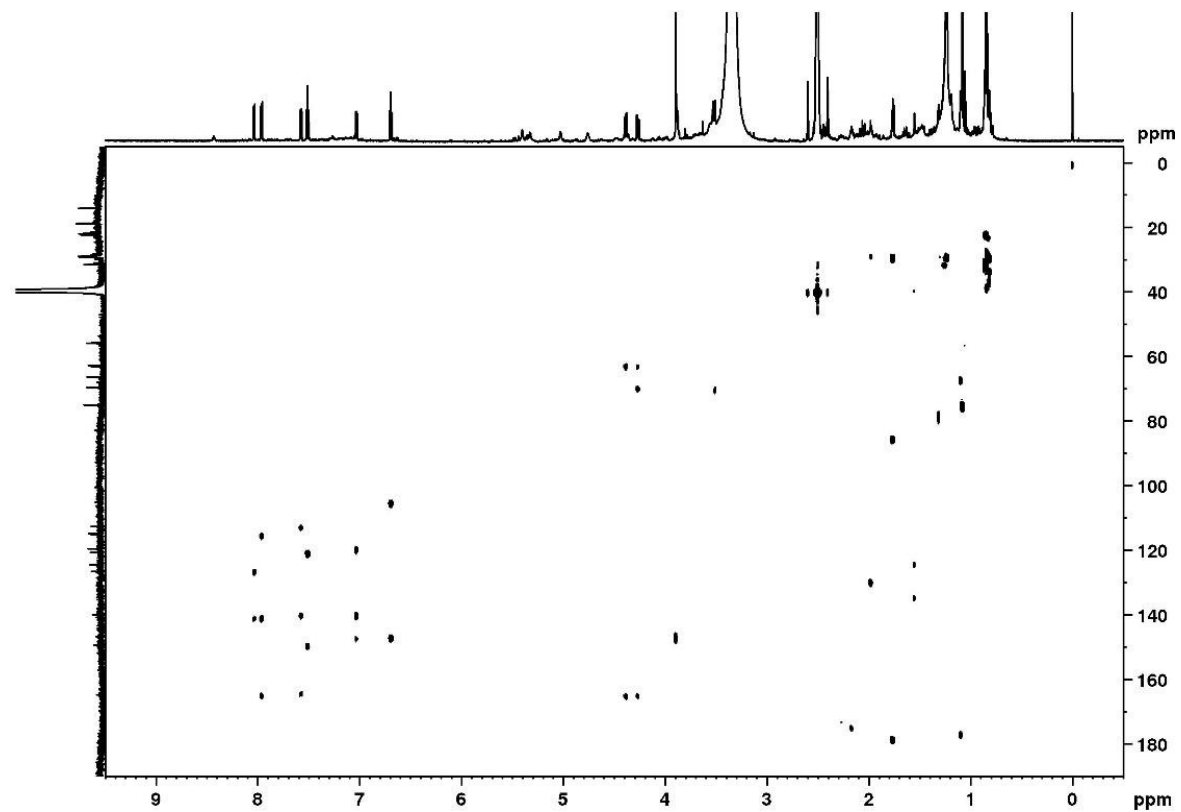

**Figure S3.** The spectroscopic data of **2**  
(G) The  $^1\text{H}$ - $^1\text{H}$  COSY spectrum of **2**

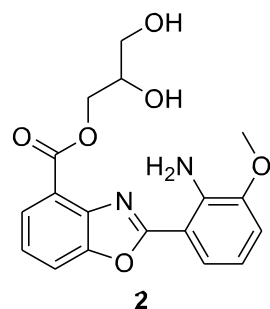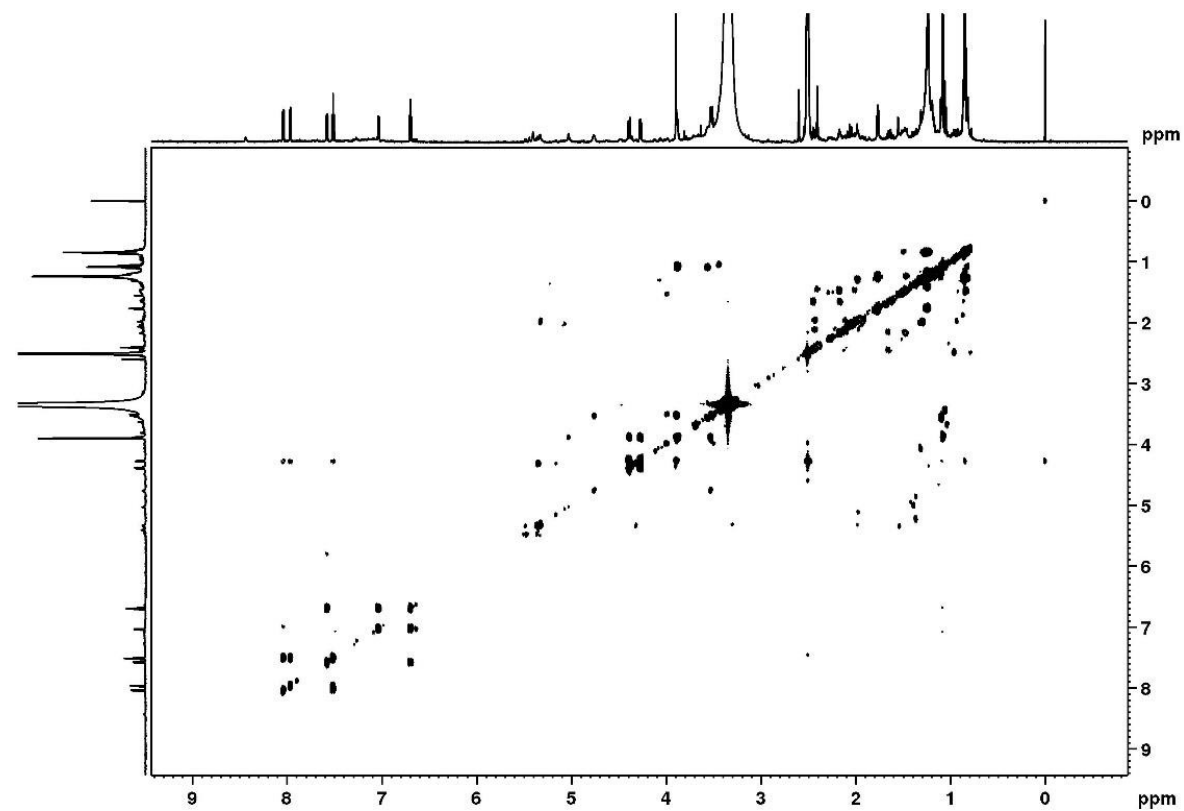

**Figure S4.** The spectroscopic data of **3**

(A) The HRESIMS (a) UV (b) of **3**

(a)

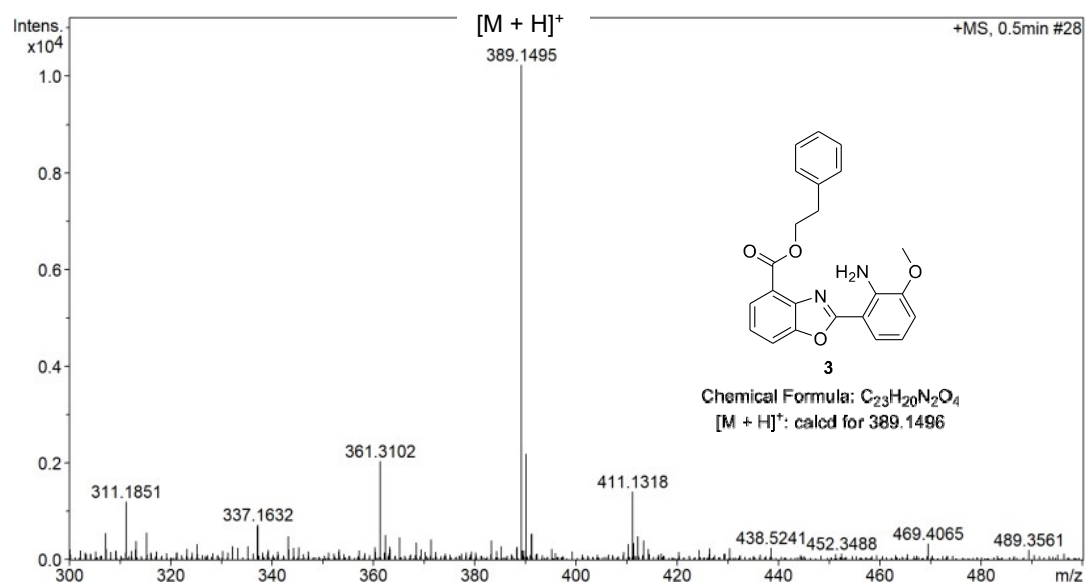

(b)

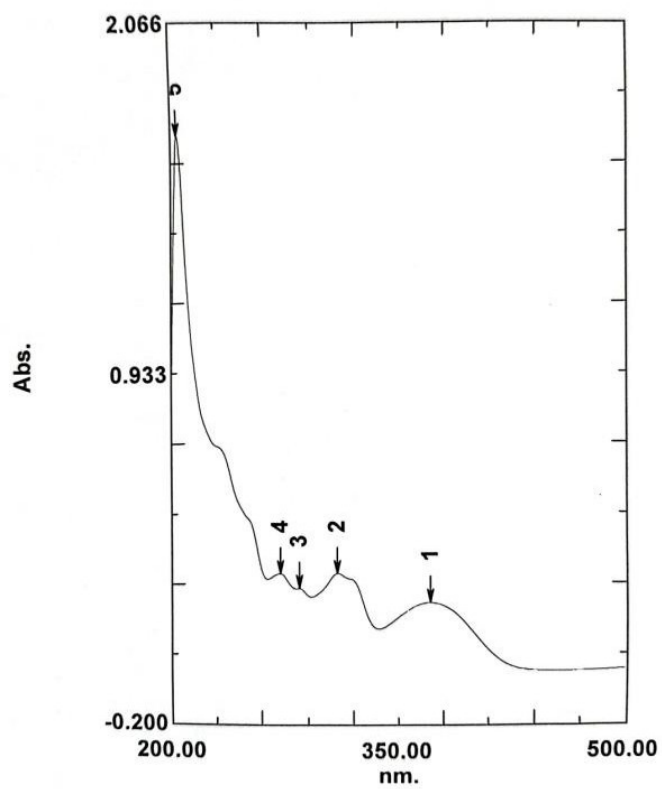

**Figure S4.** The spectroscopic data of **3**

(B) The  $^1\text{H}$ -NMR spectrum of **3** (700 MHz for  $^1\text{H}$  NMR in  $\text{DMSO}-d_6$ )

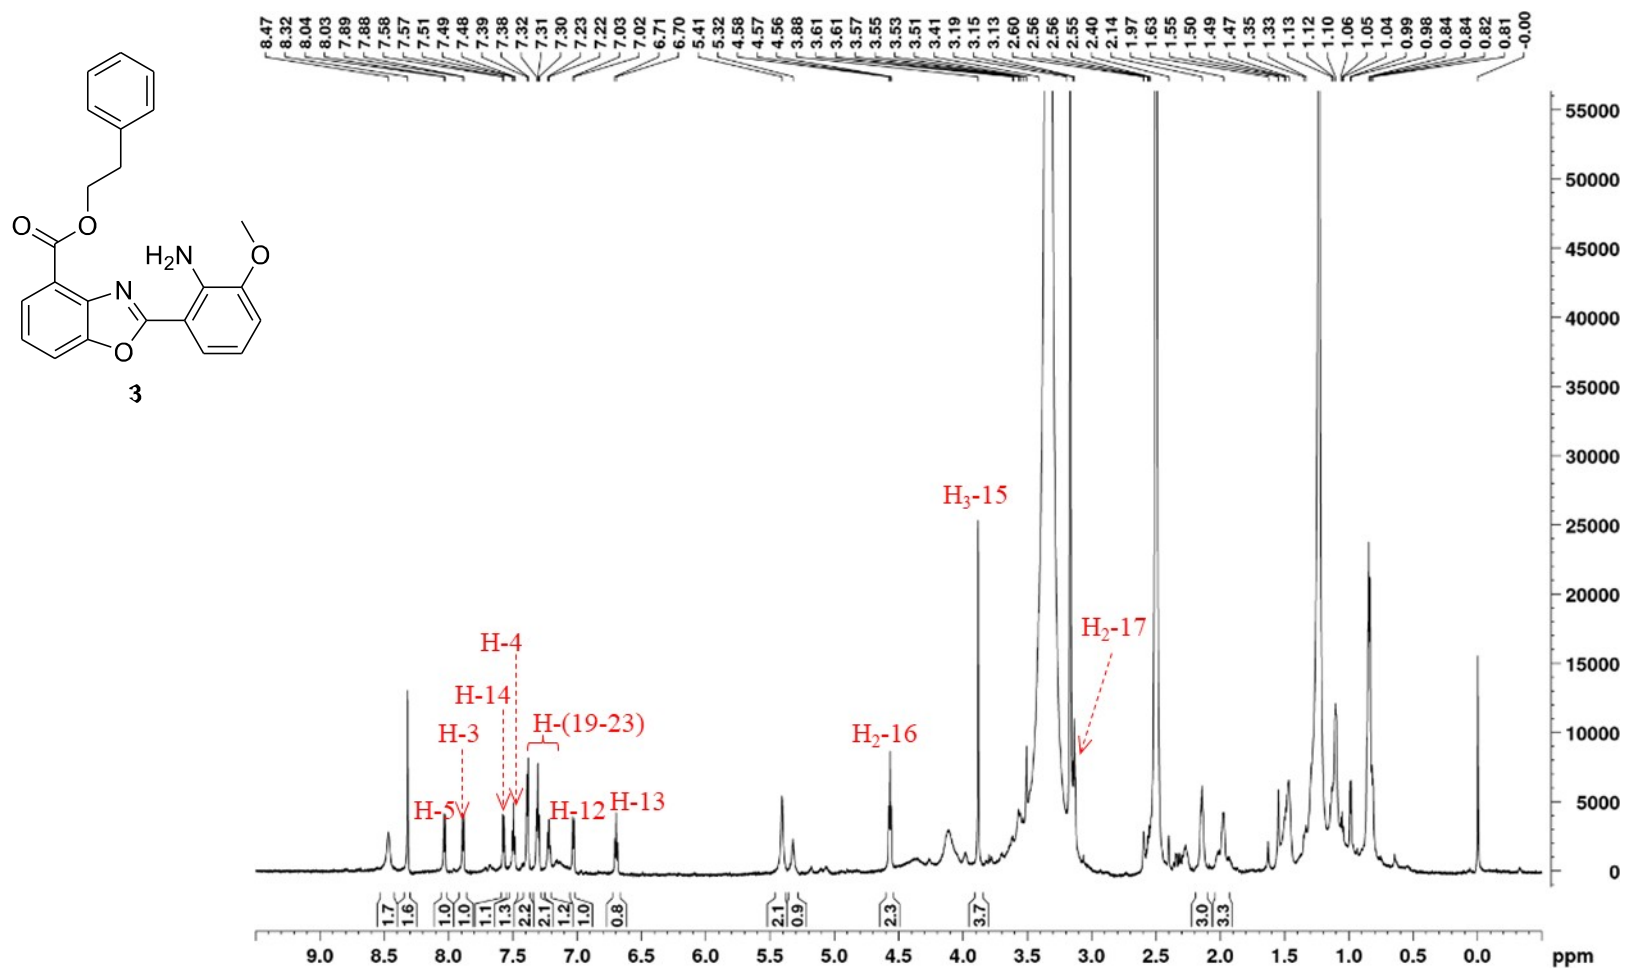



**Figure S4.** The spectroscopic data of **3**  
 (C) The  $^{13}\text{C}$  NMR spectrum of compound **3** in  $\text{DMSO}-d_6$  (175 MHz)

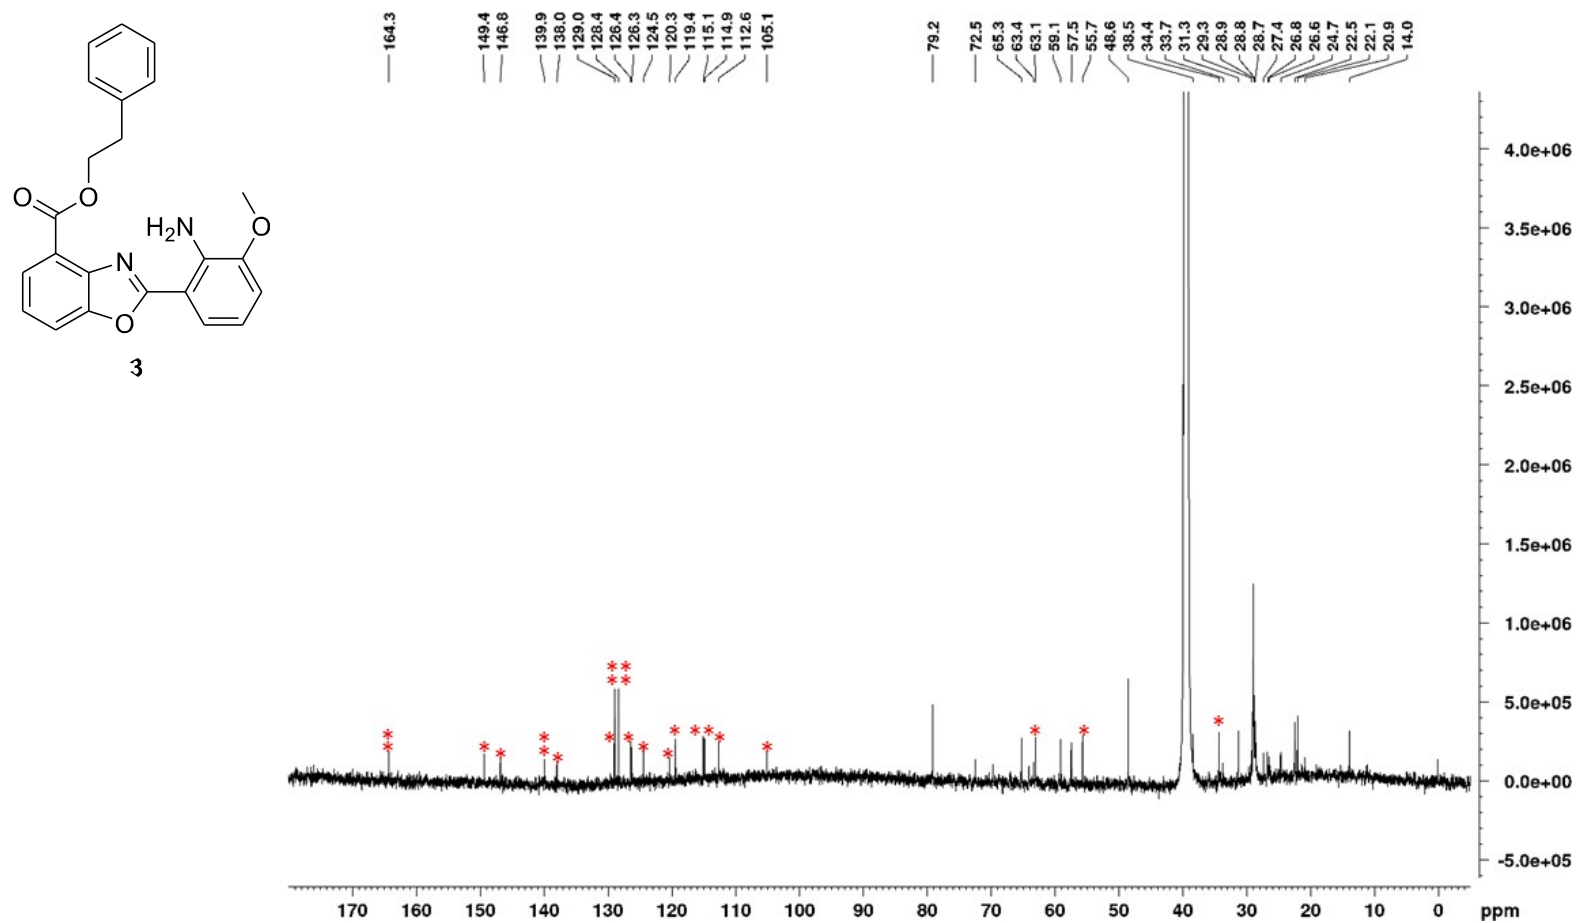

**Figure S4.** The spectroscopic data of **3**  
**(D)** The DEPT135 spectrum of **3**

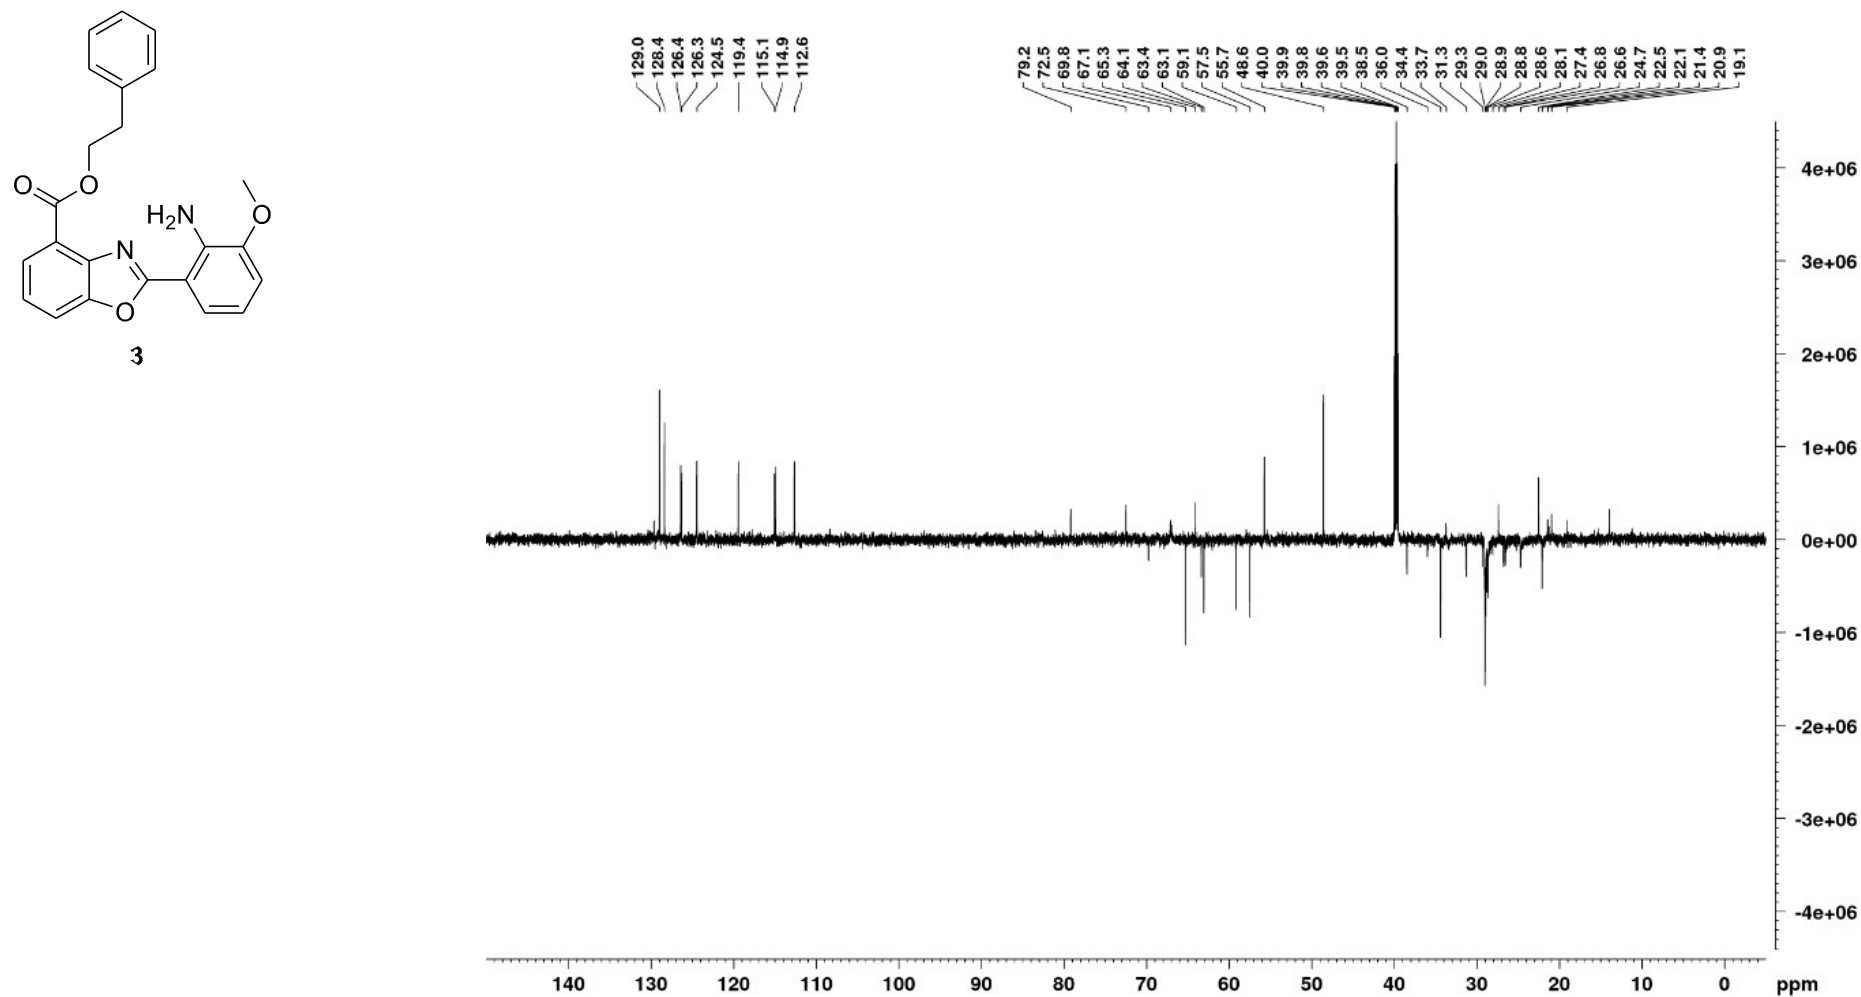

**Figure S4.** The spectroscopic data of **3**  
**(E)** The HSQC spectrum of compound **3**

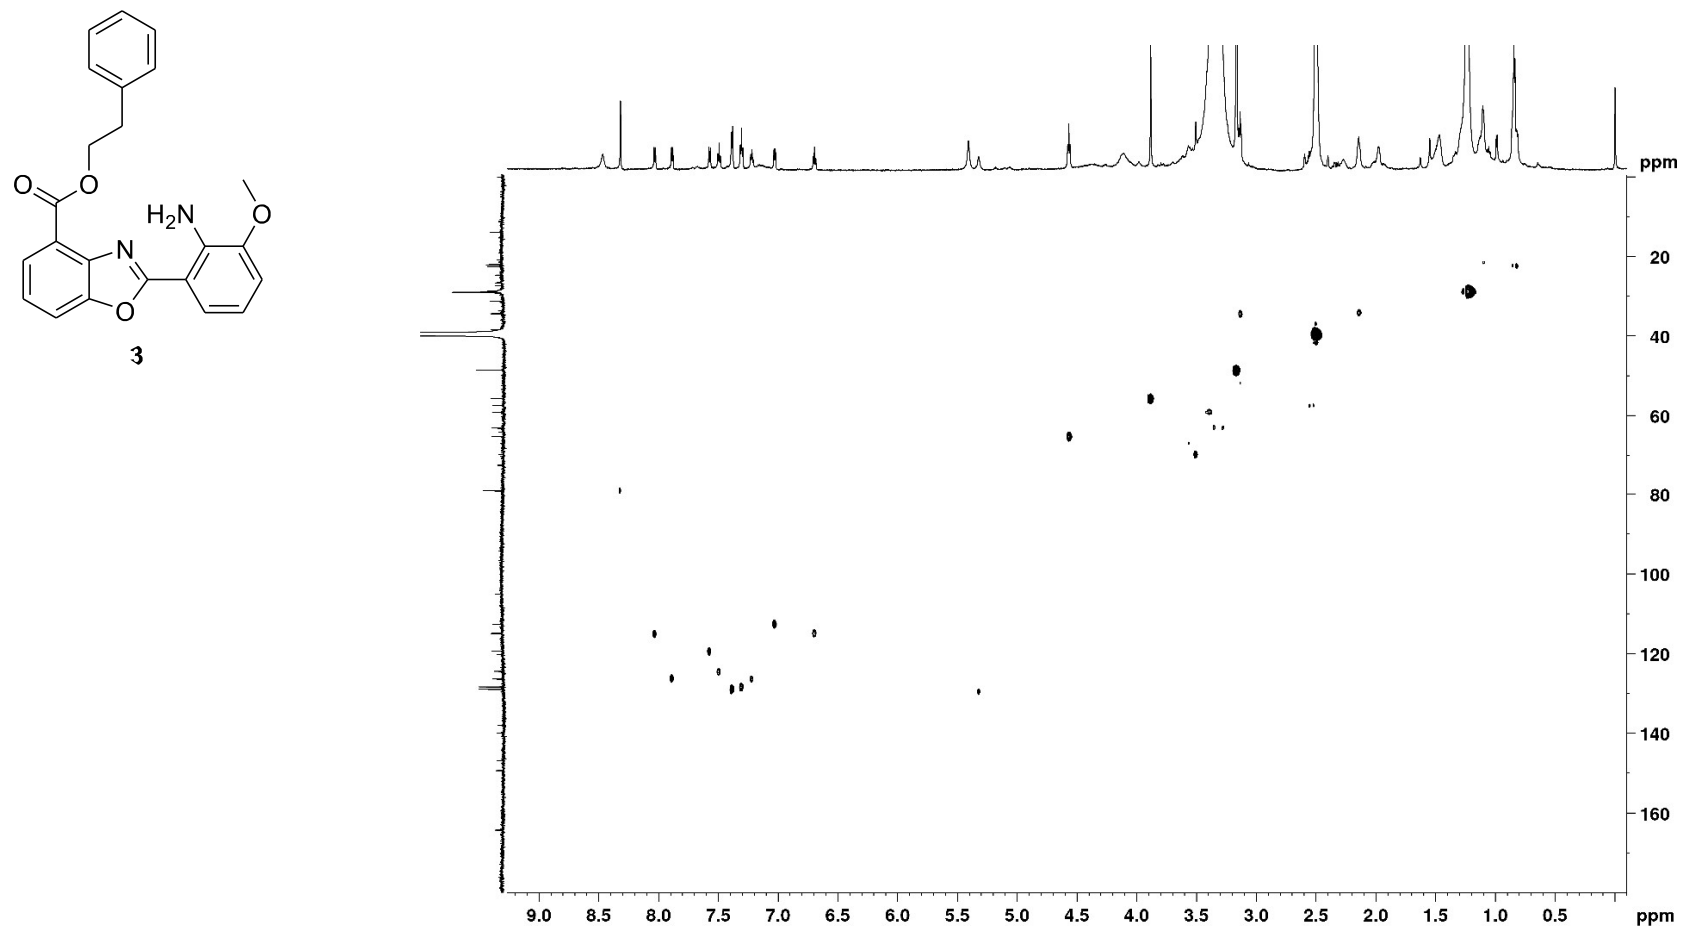

**Figure S4.** The spectroscopic data of **3**  
**(F)** The HMBC spectrum of **3**

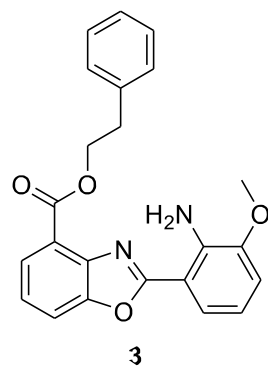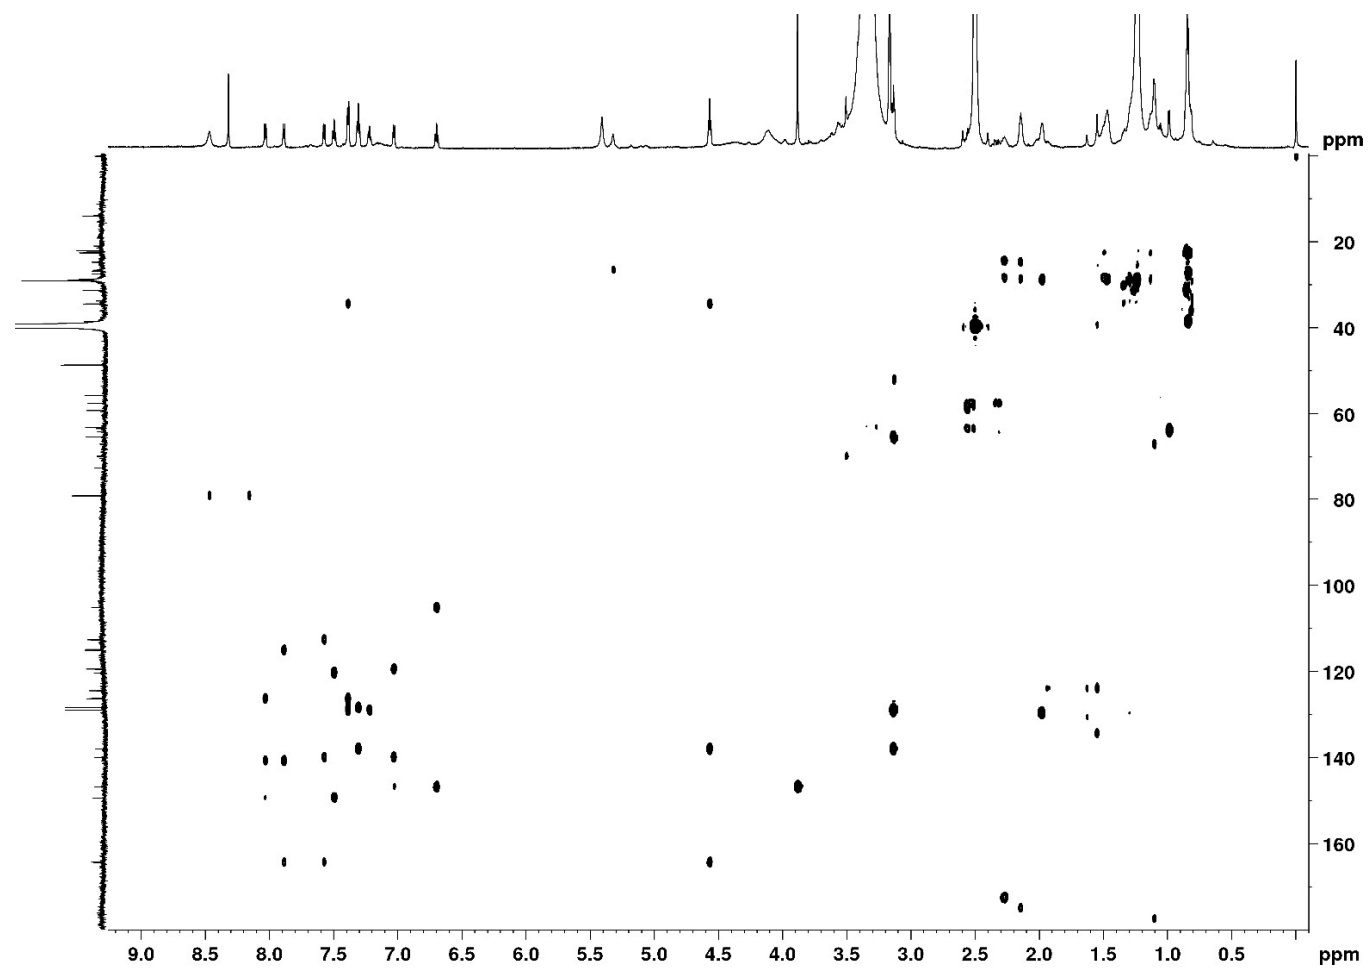

**Figure S4.** The spectroscopic data of **3**  
(G) The  $^1\text{H}$ - $^1\text{H}$  COSY spectrum of **3**

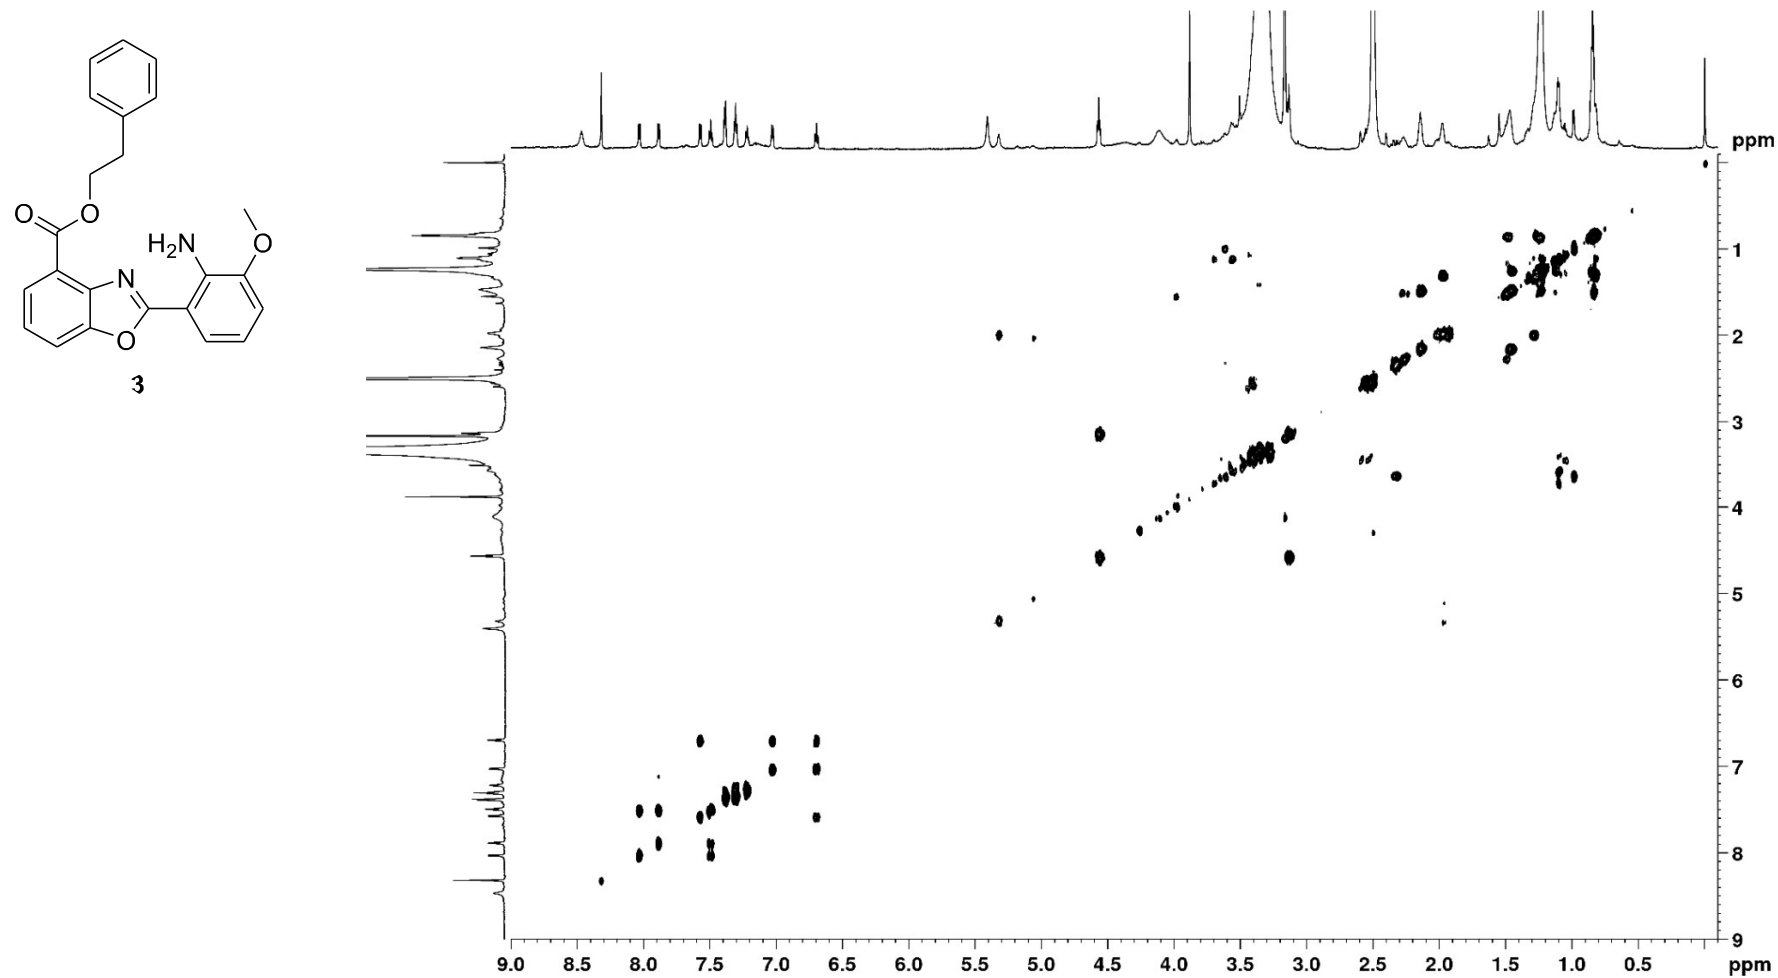

**Figure S5.** The spectroscopic data of **4**

(A) The HRESIMS (a) and UV (b) spectrum of **4**

(a)

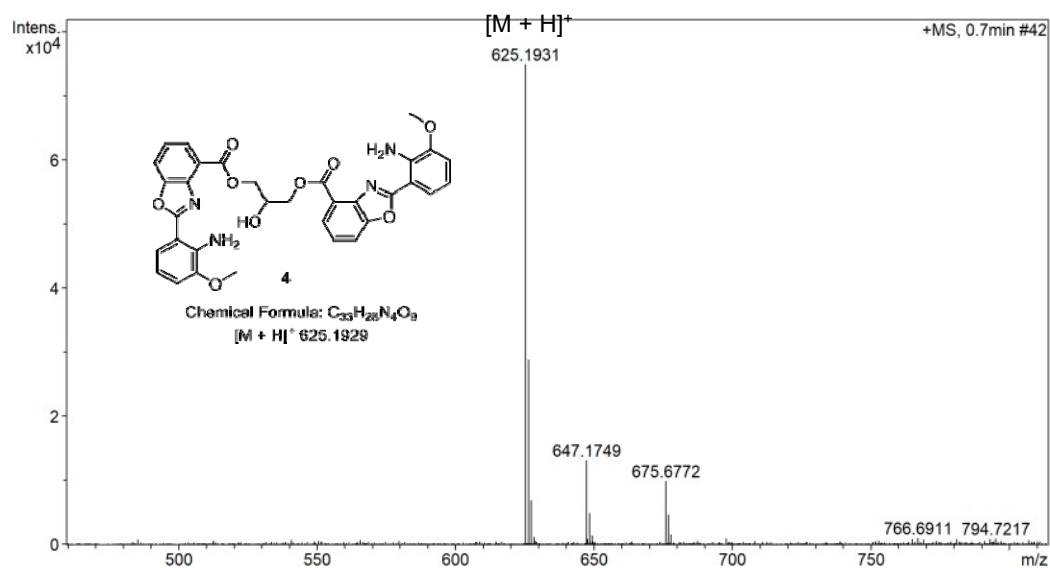

(b)

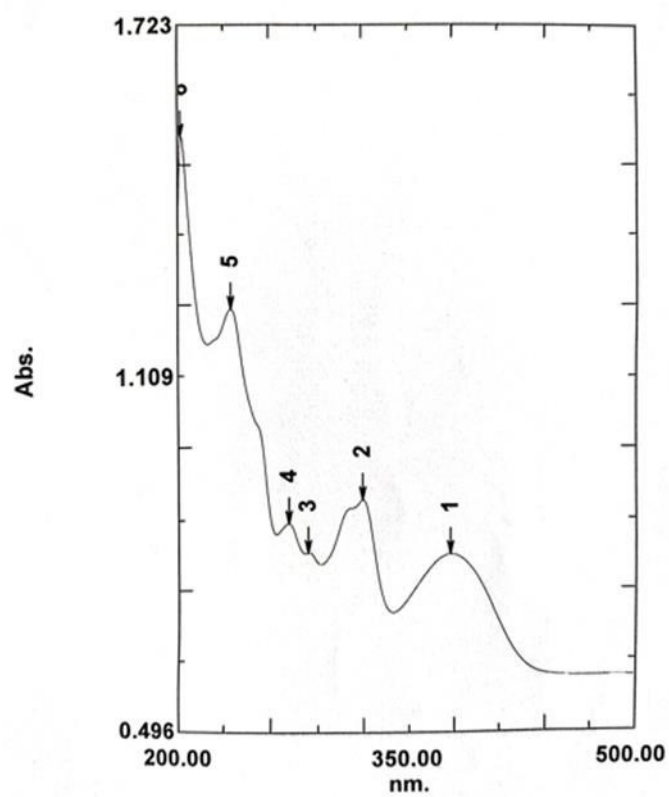

**Figure S5.** The spectroscopic data of **4**

(B) The  $^1\text{H}$ -NMR spectrum of **4** (700 MHz for  $^1\text{H}$  NMR in  $\text{CDCl}_3$ )

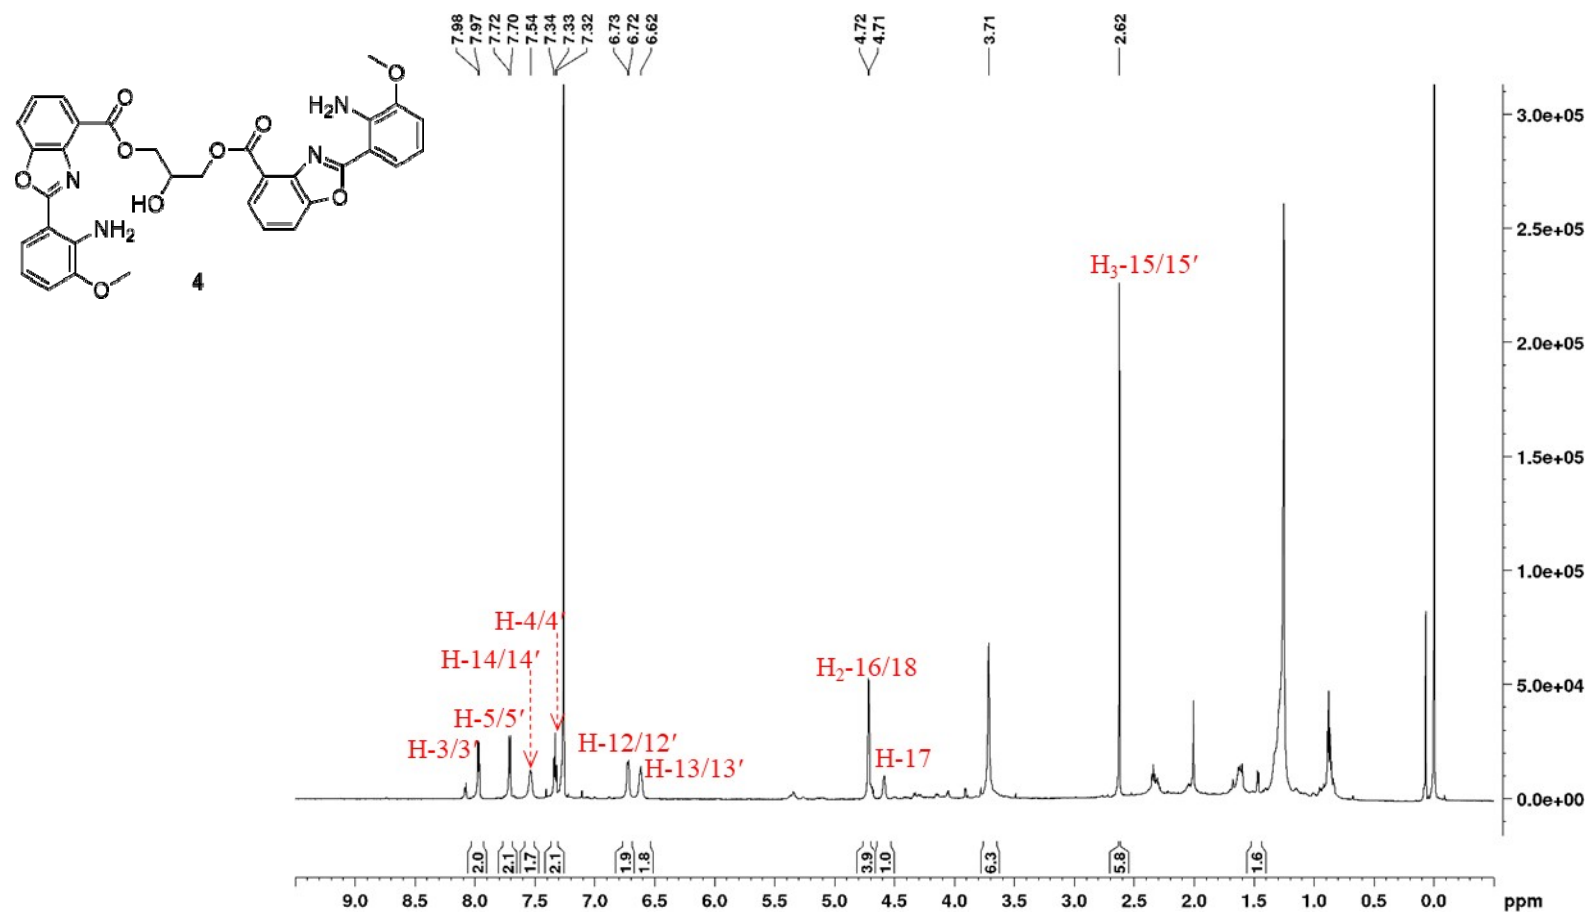

**Figure S5.** The spectroscopic data of **4**  
 (C) The  $^{13}\text{C}$  NMR spectrum of compound **4** in  $\text{CDCl}_3$  (175 MHz)

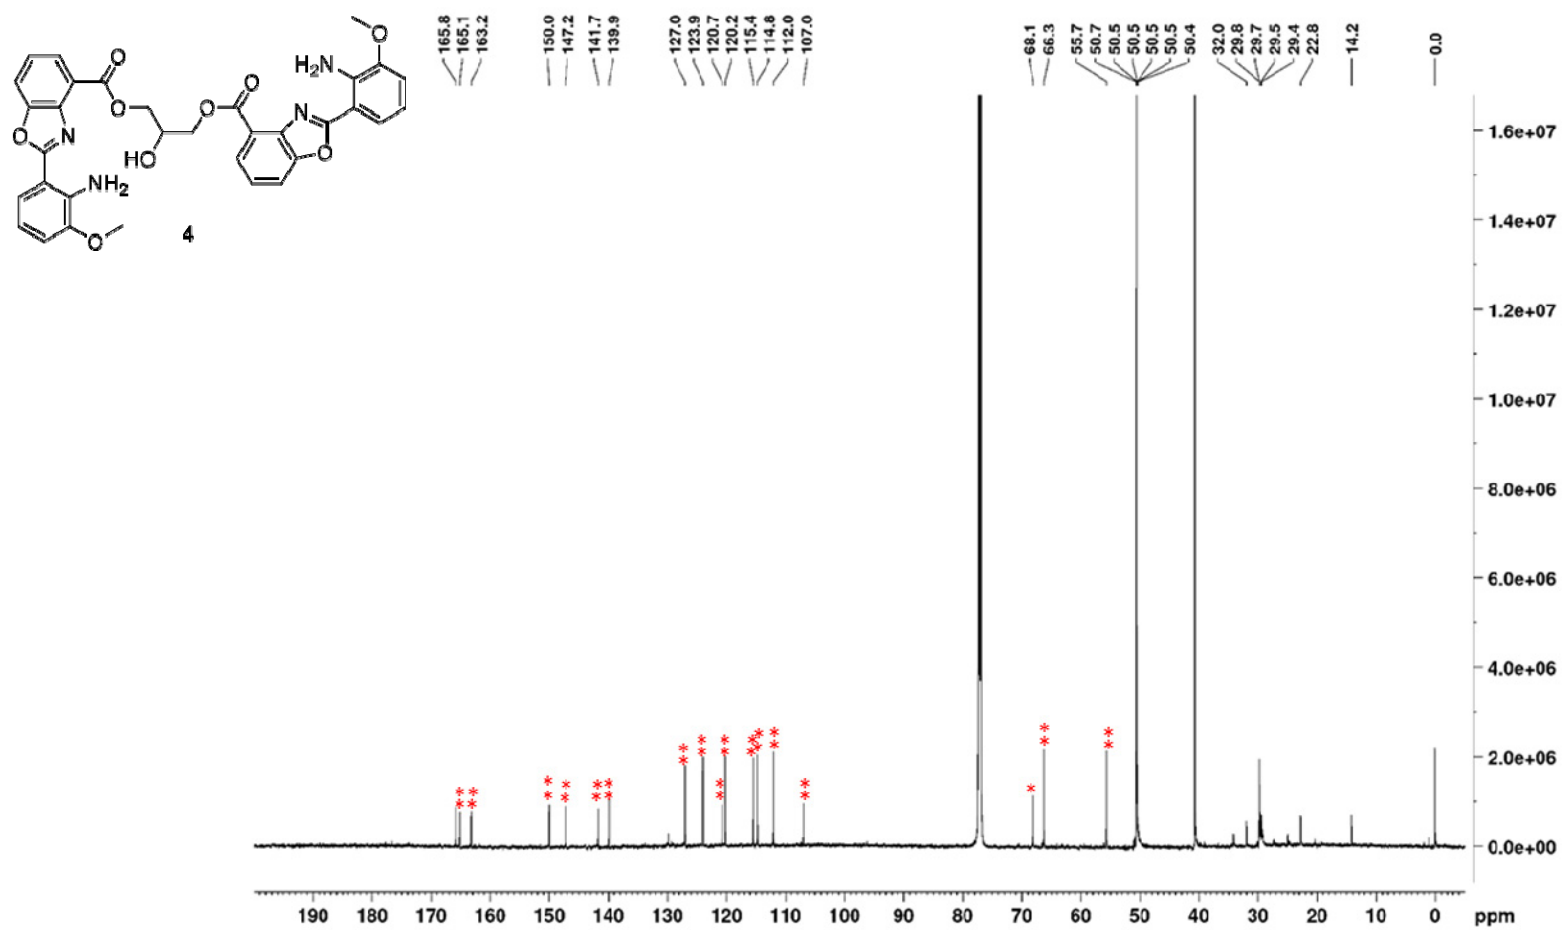



**Figure S5.** The spectroscopic data of **4**  
**(D)** The DEPT135 spectrum of **4**

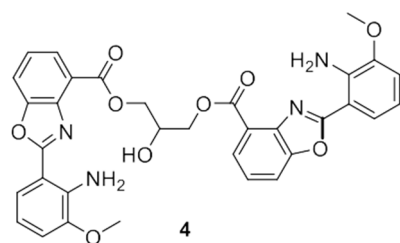

**4**

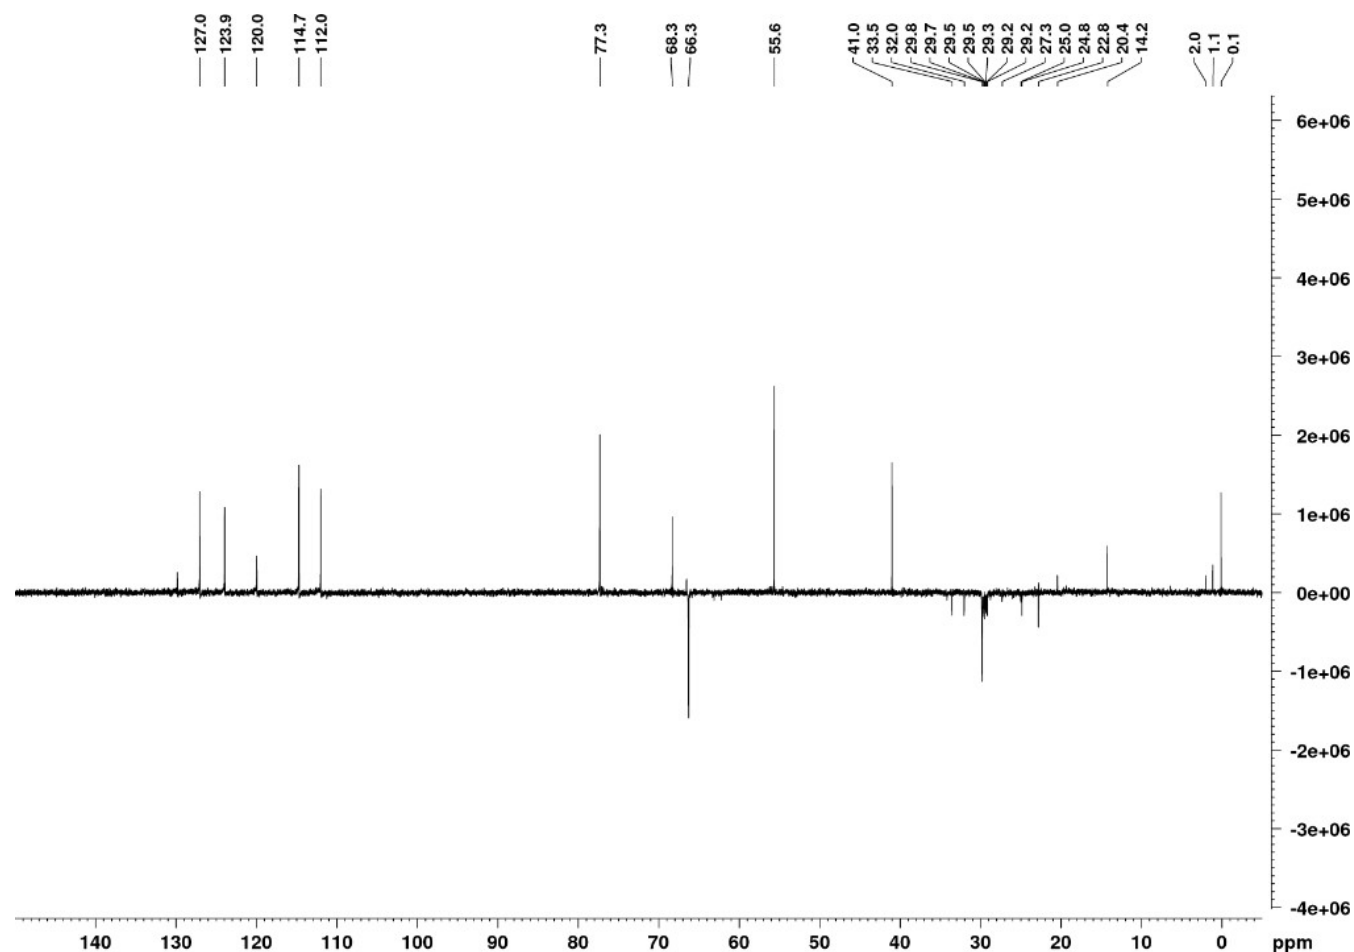

**Figure S5.** The spectroscopic data of **4**  
**(E)** The HSQC spectrum of compound **4**

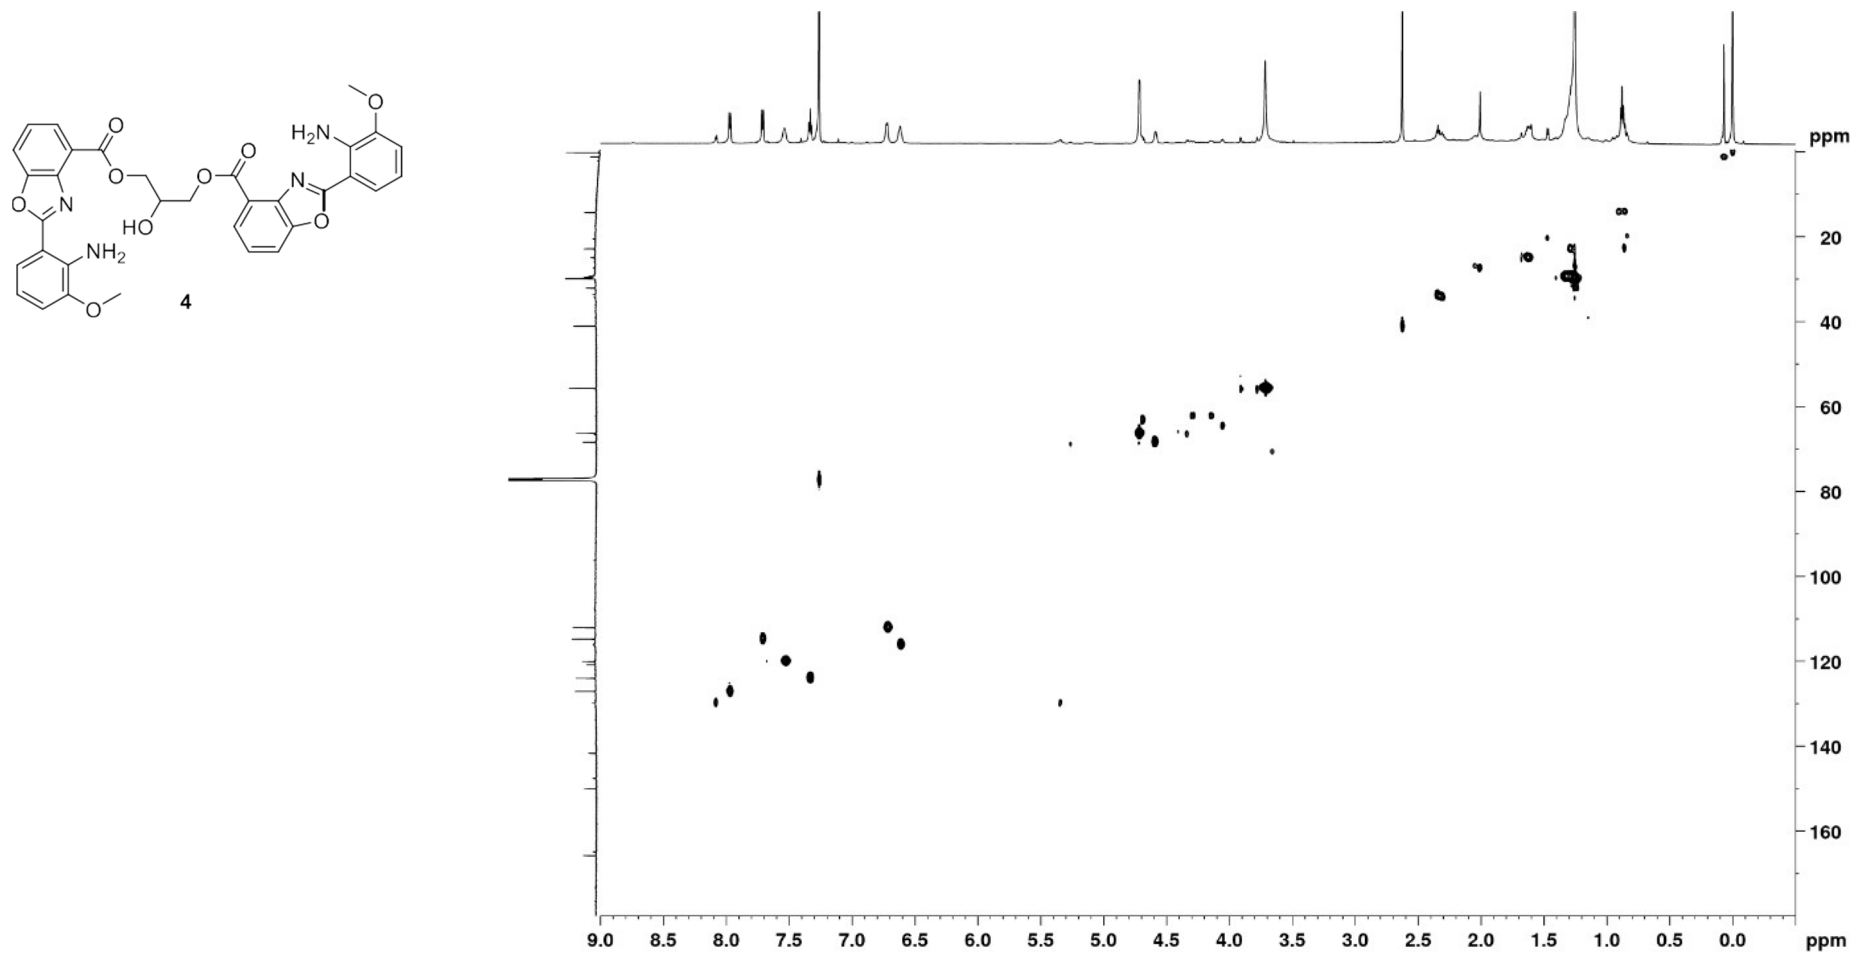

**Figure S5.** The spectroscopic data of **4**  
**(F)** The HMBC spectrum of **4**

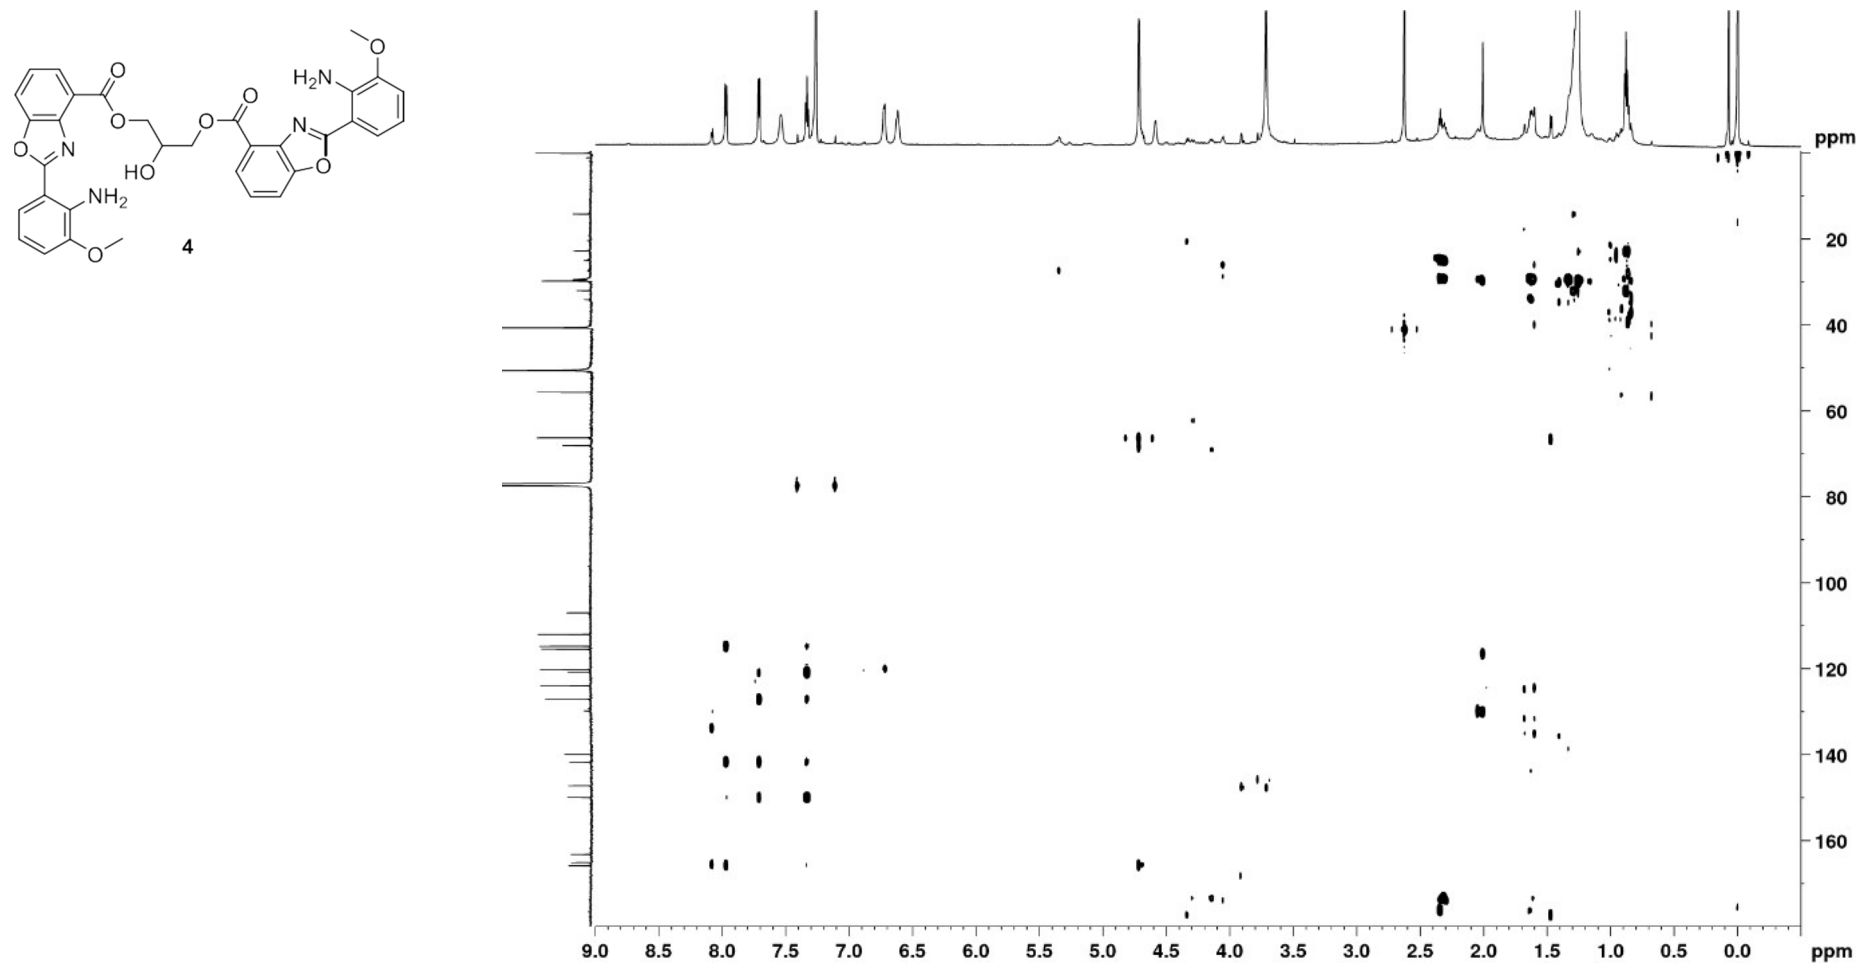

**Figure S5.** The spectroscopic data of **4**  
**(G)** The  $^1\text{H}$ - $^1\text{H}$  COSY spectrum of **4**

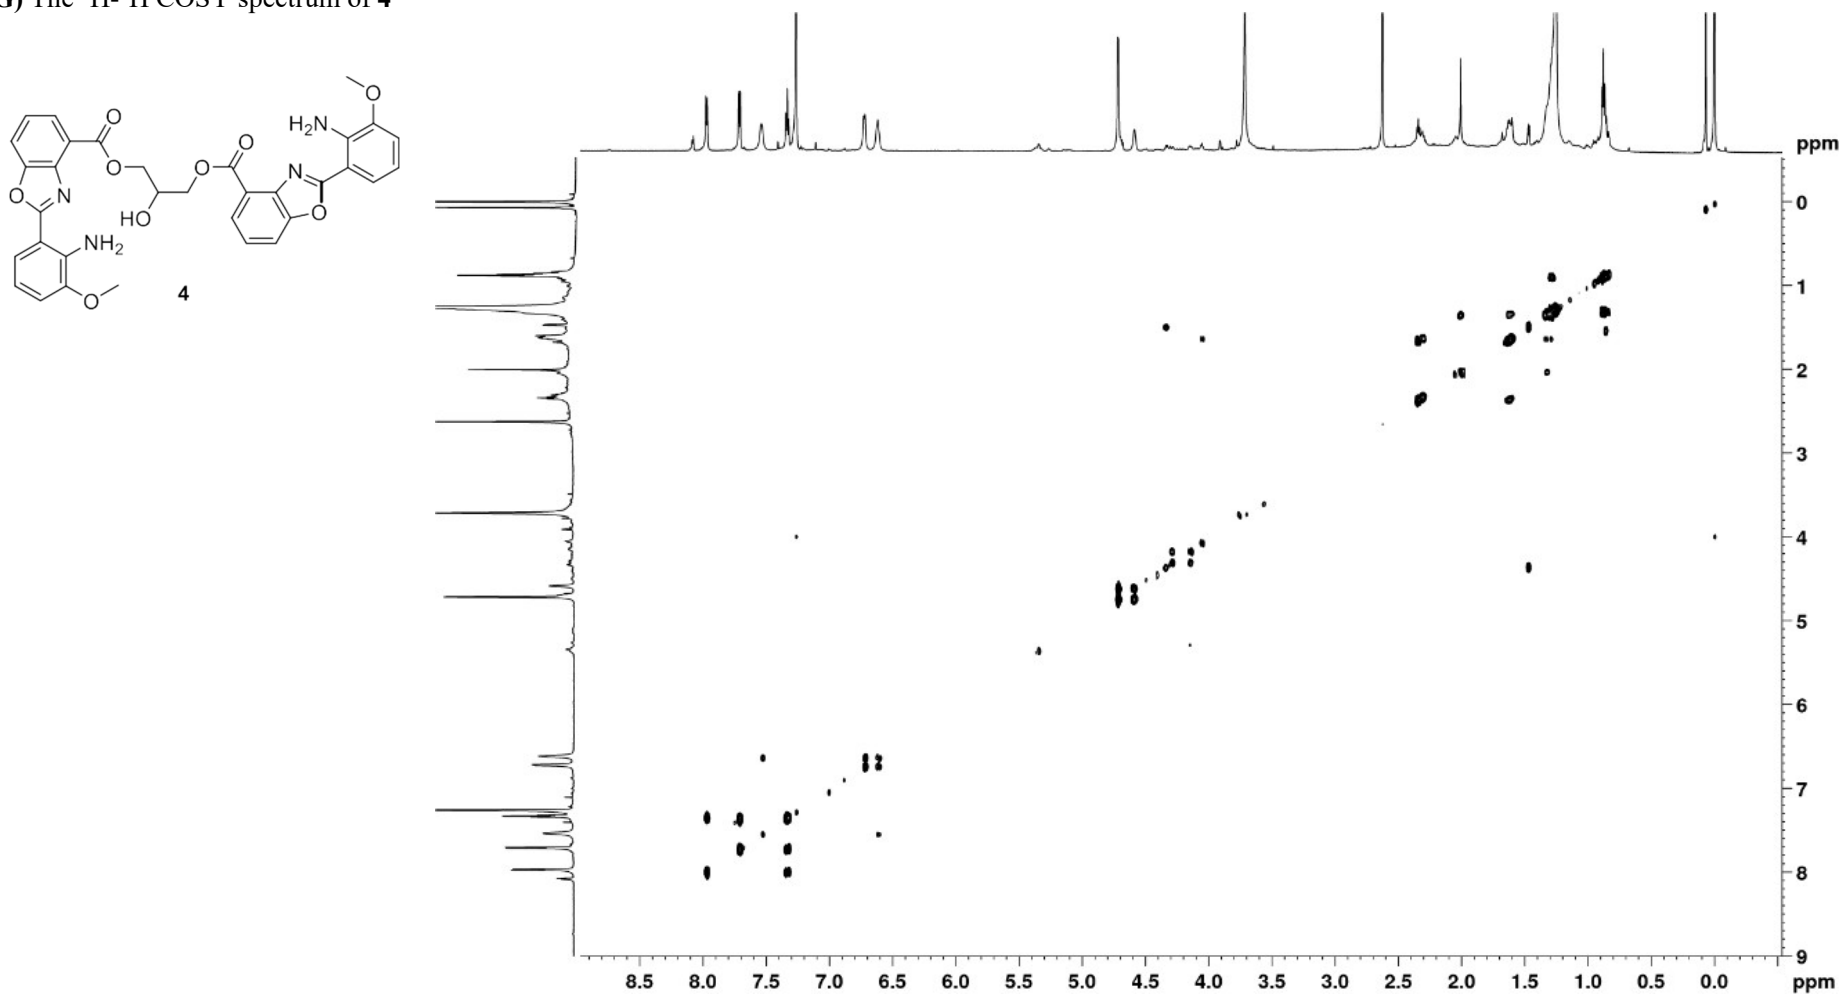

**Figure S6.** The spectroscopic data of **5**

(A) The HRESIMS (a), UV (b), CD (c) spectrum and chiral HPLC analysis (d) of **5**

(a)

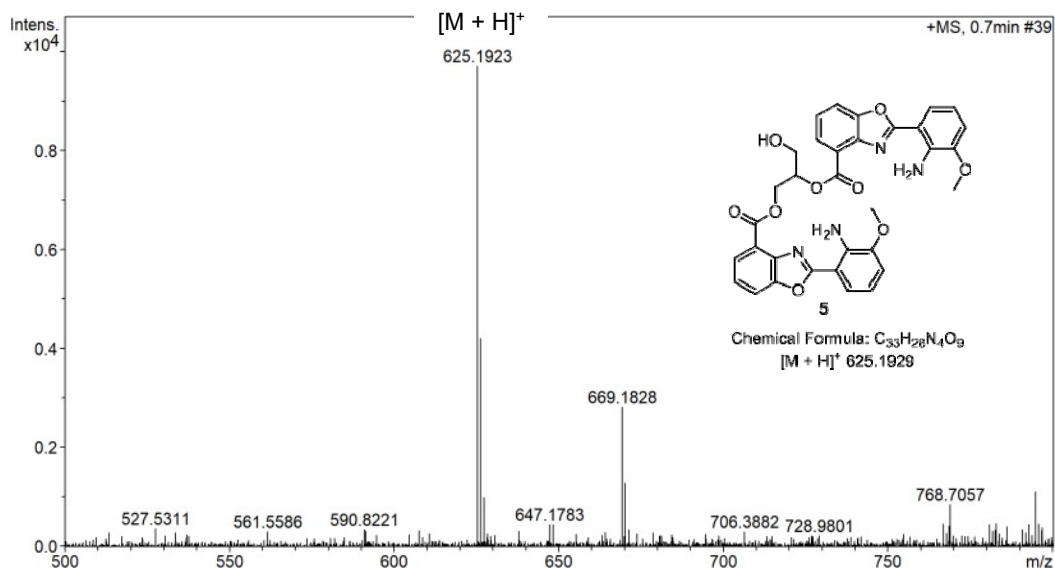

(b)

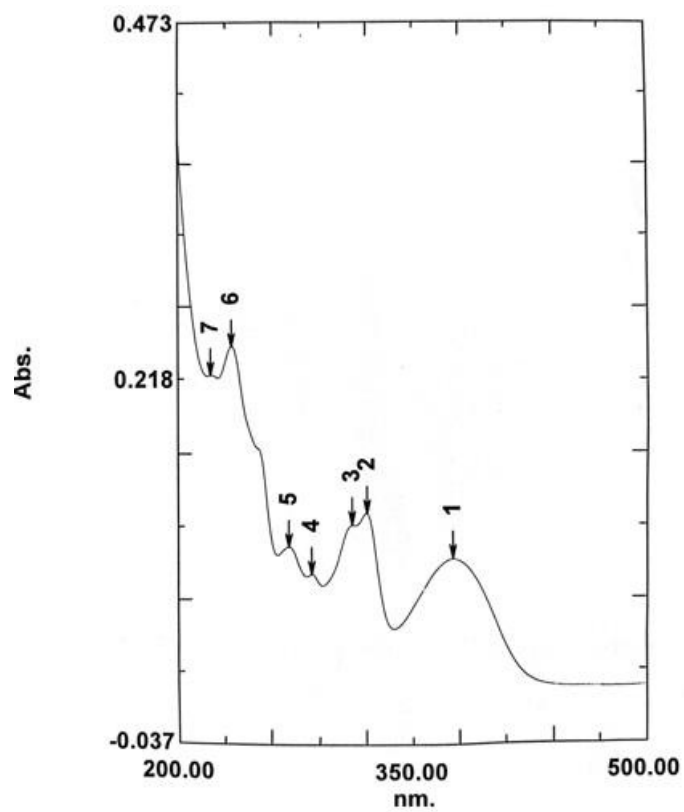

(c)

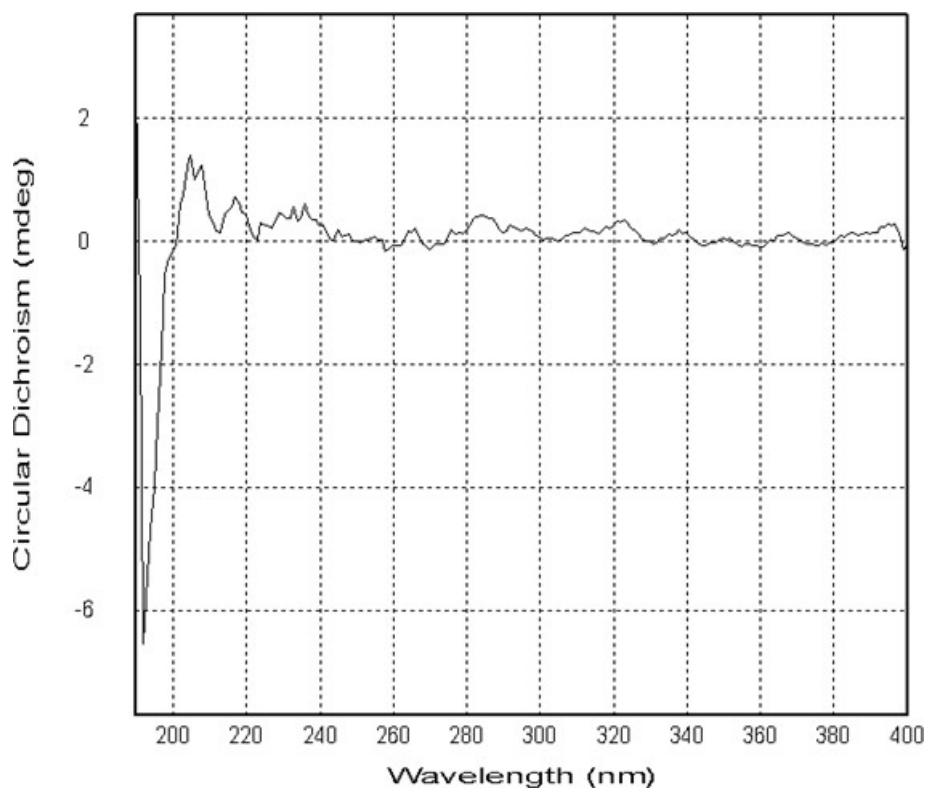

(d) Chiral HPLC analysis of **5**

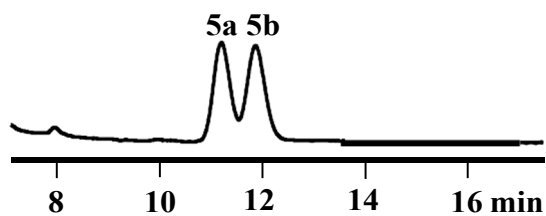

Chiral HPLC analysis of compound **5** was conducted by using a chiral column (Lux Cellulose-4, 5  $\mu$ m, 250  $\times$  4.6 mm, phenomenex) using the following program: solvent system (solvent A, 10% CH<sub>3</sub>CN in water; solvent B, 90% CH<sub>3</sub>CN in water); 5% B to 100% B (0–20 min), 100% B (21–25 min), 100% B to 5%B (25–26 min), 5% B (26–30 min), flow rate at 1 mL min<sup>-1</sup>.

**Figure S6.** The spectroscopic data of **5**

(B) The  $^1\text{H}$ -NMR spectrum of **5** (700 MHz for  $^1\text{H}$  NMR in  $\text{CDCl}_3$ )

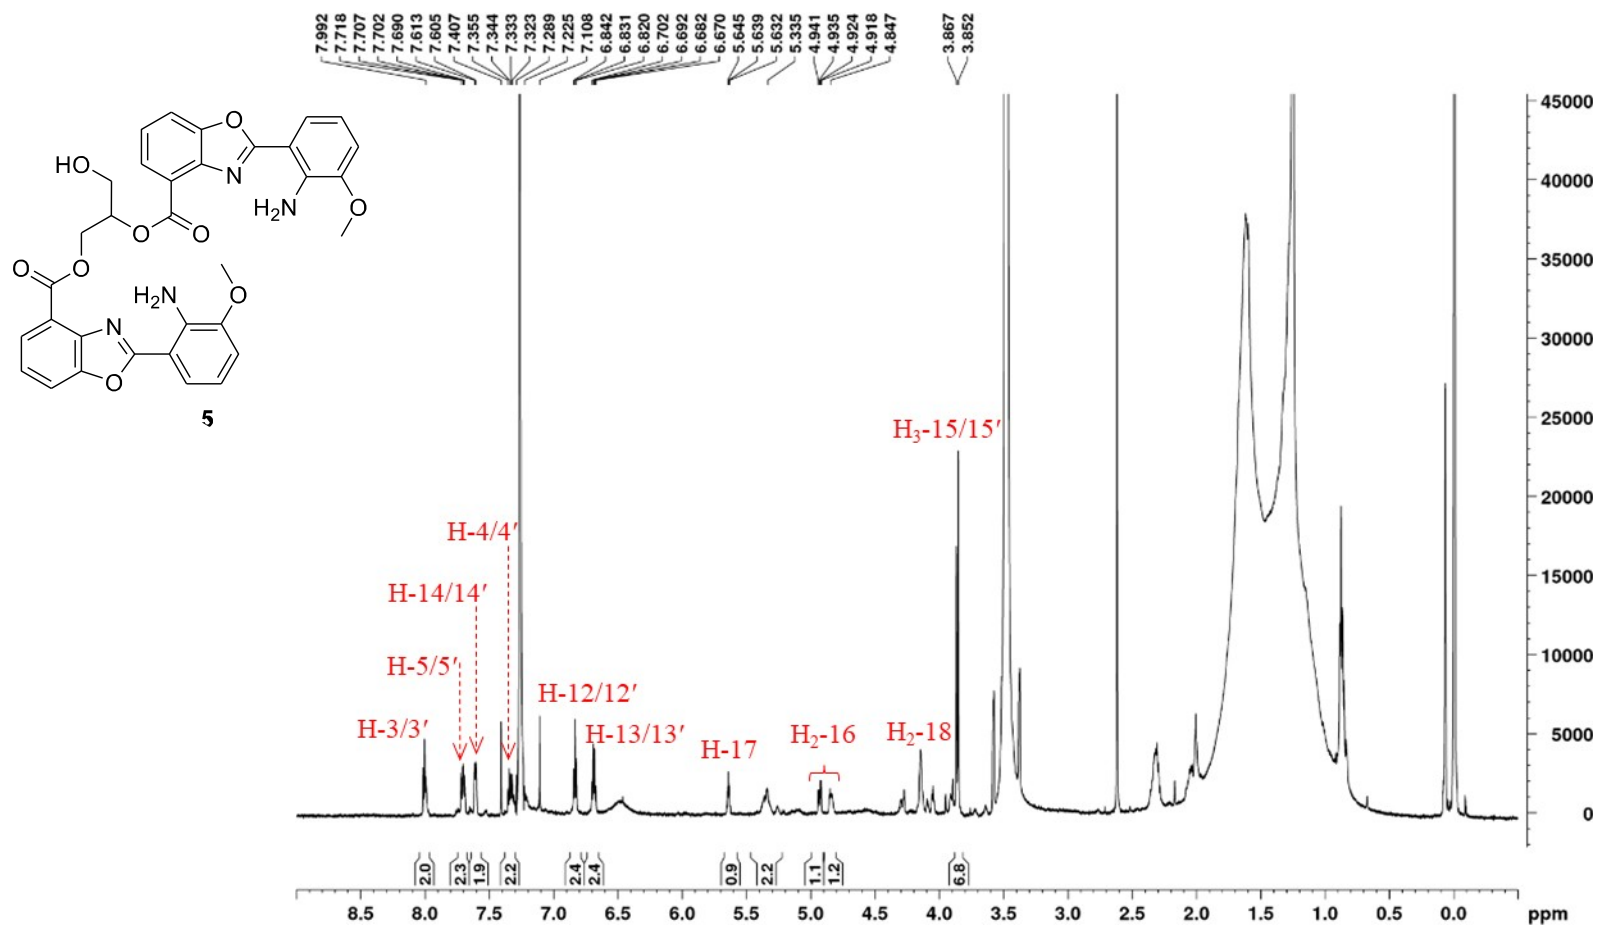

**Figure S6.** The spectroscopic data of **5**  
 (C) The  $^{13}\text{C}$  NMR spectrum of compound **5** in  $\text{CDCl}_3$  (175 MHz)

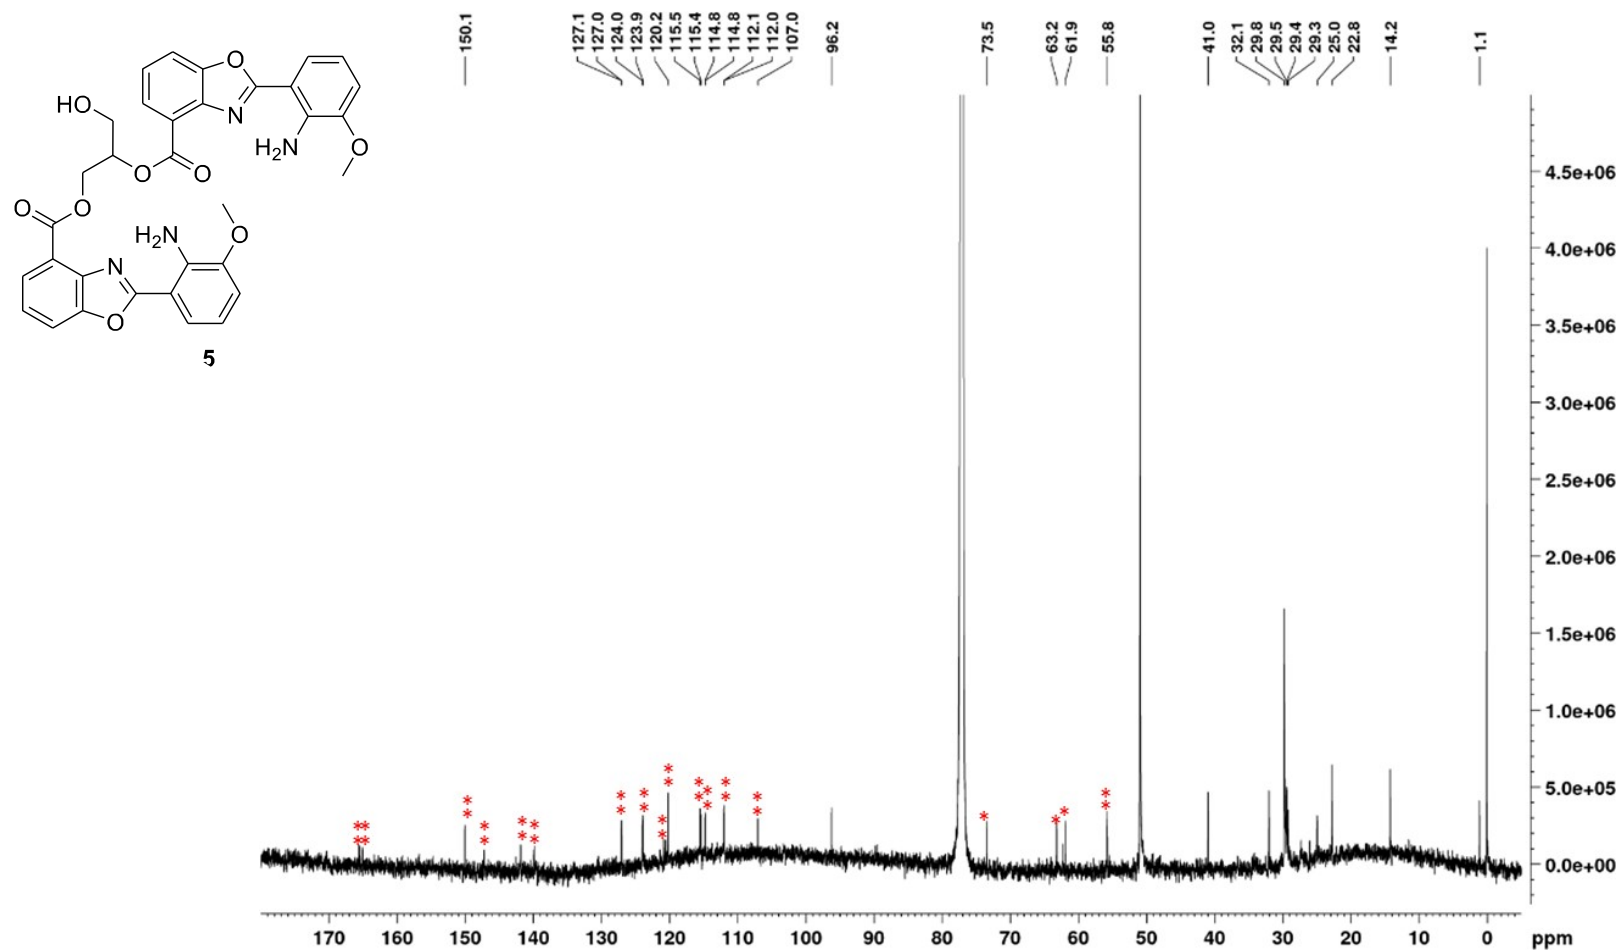



**Figure S6.** The spectroscopic data of **5**  
**(D)** The DEPT135 spectrum of **5**

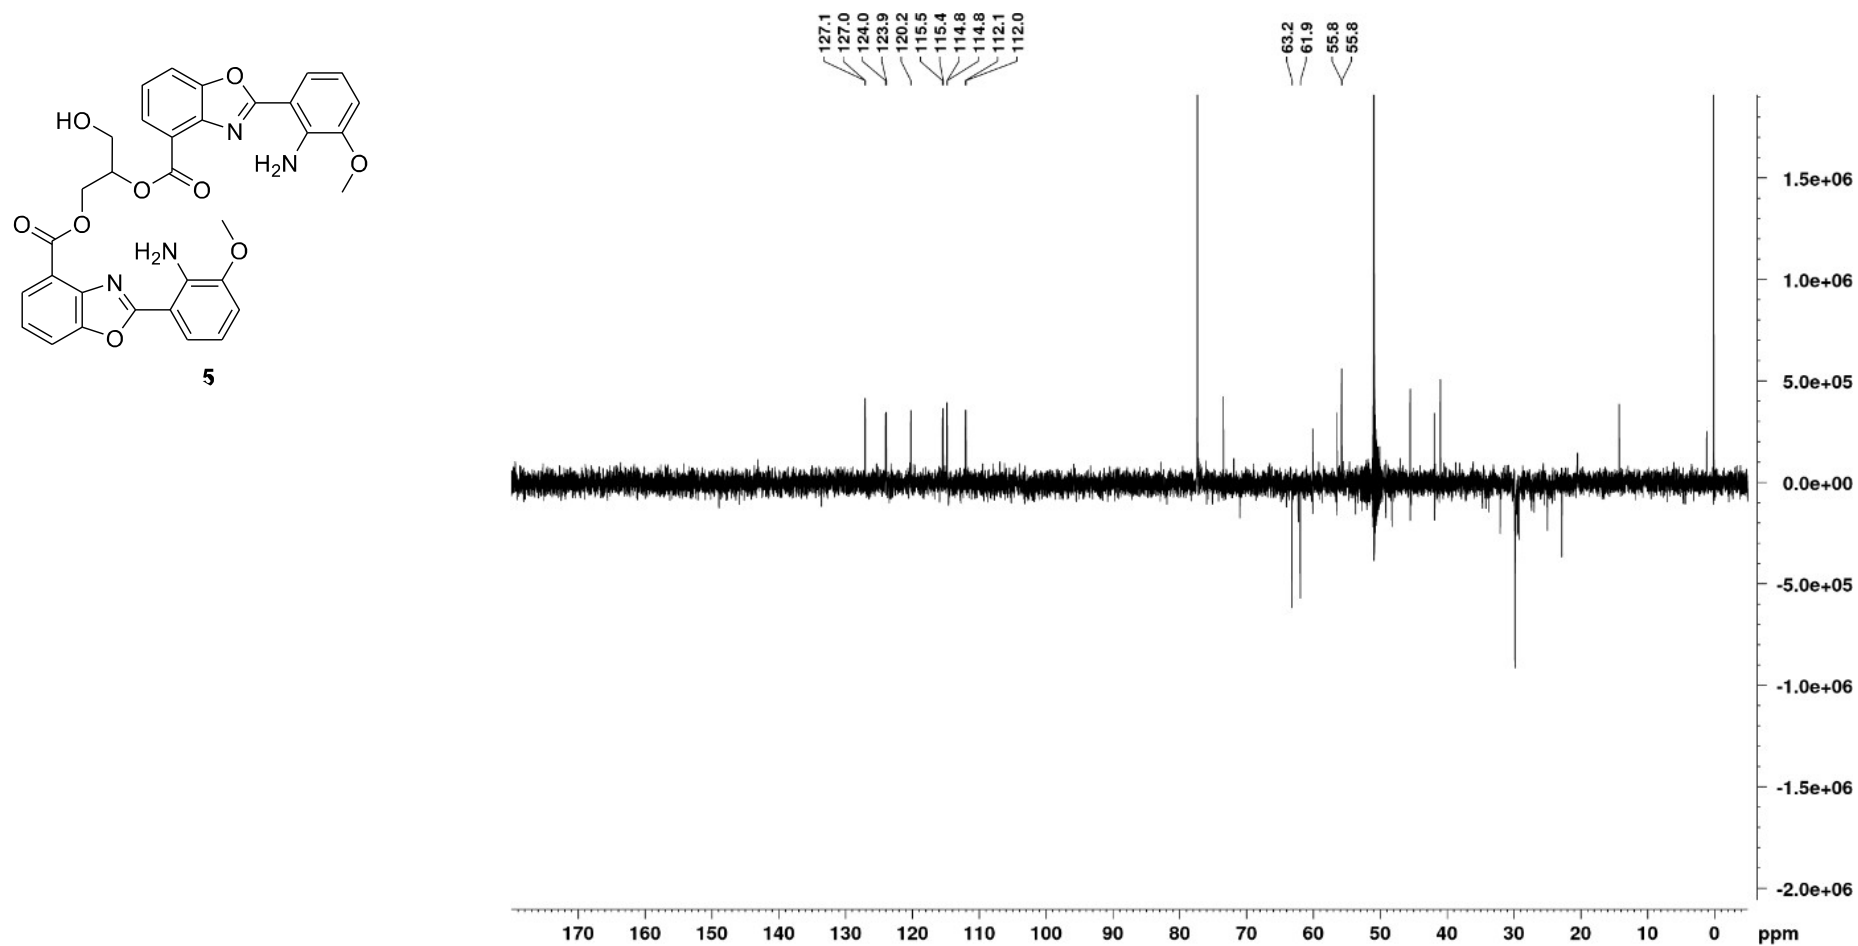

**Figure S6.** The spectroscopic data of **5**  
**(E)** The HSQC spectrum of compound **5**

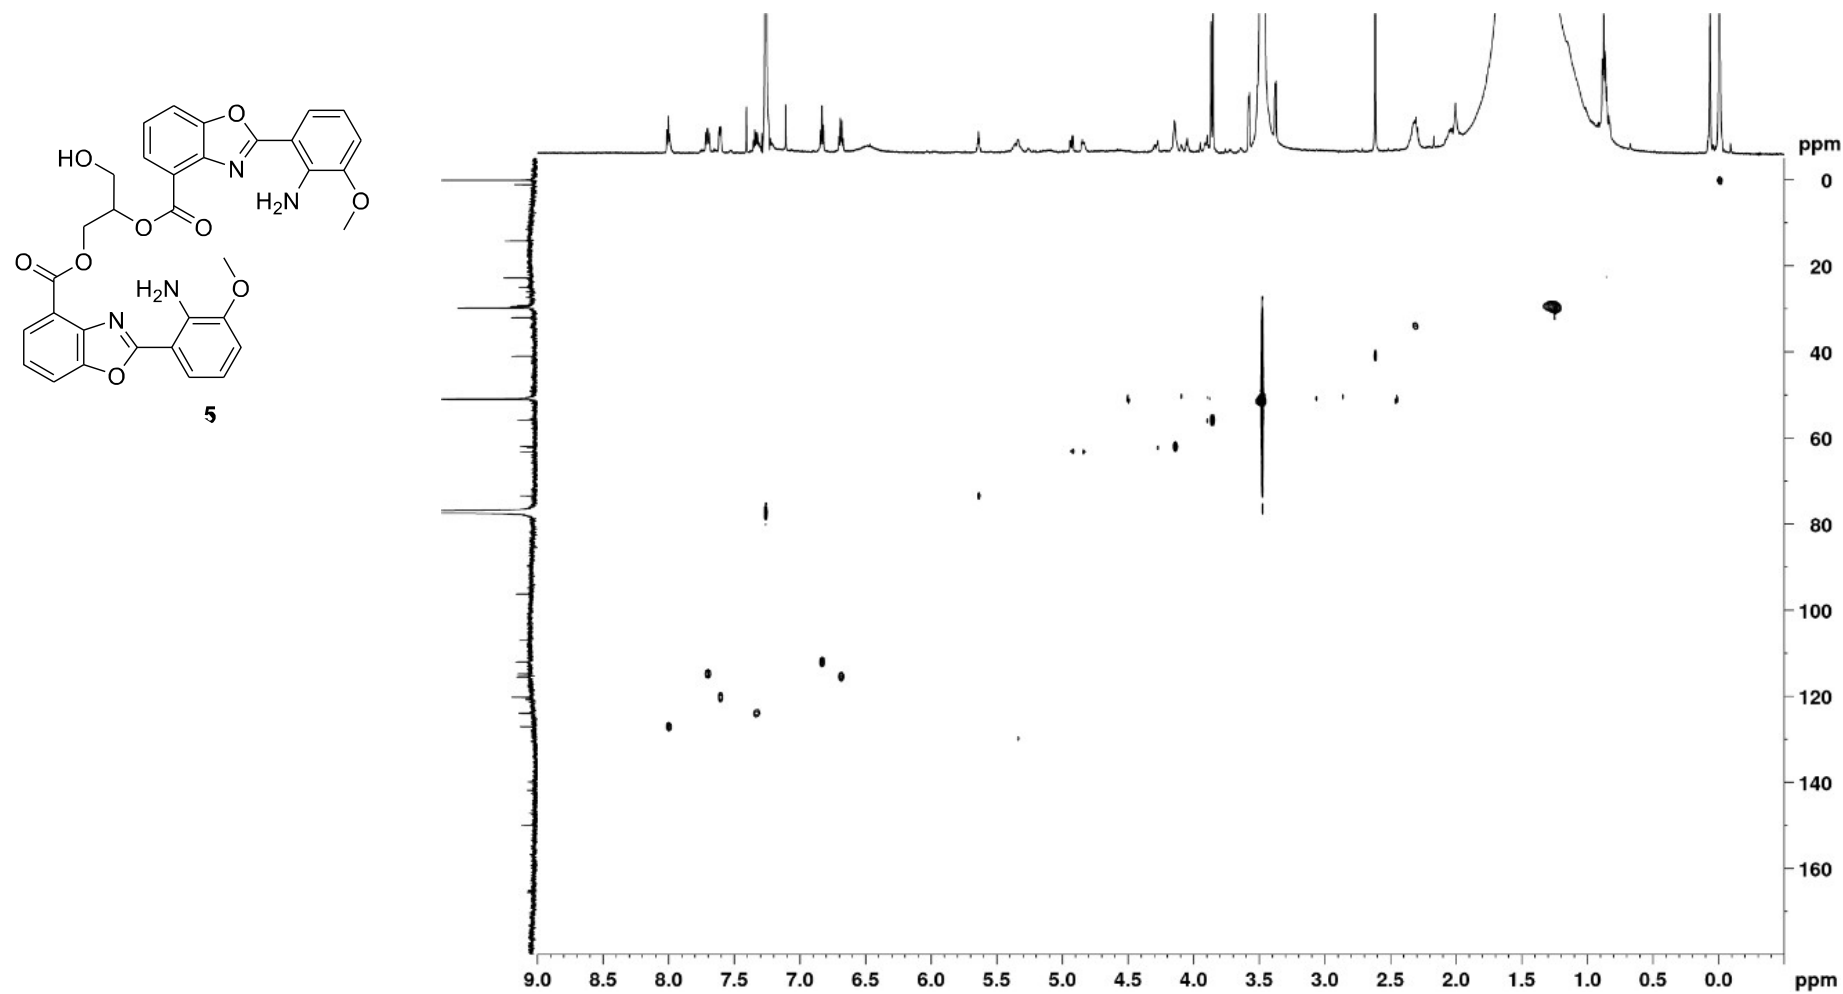

**Figure S6.** The spectroscopic data of **5**  
**(F)** The HMBC spectrum of **5**

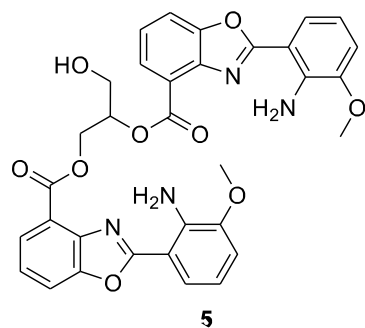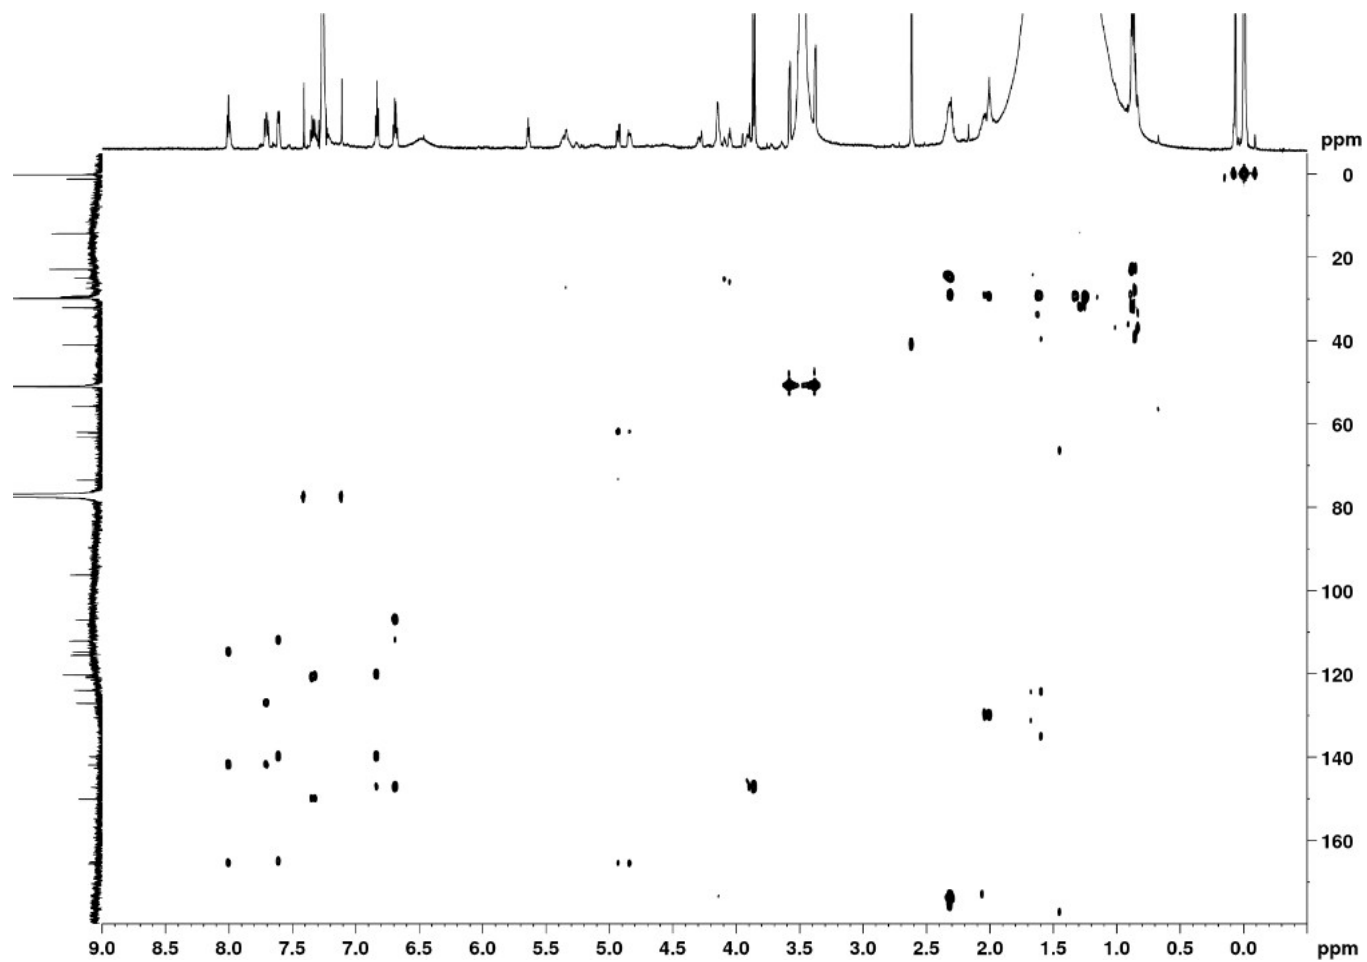

**Figure S6.** The spectroscopic data of **5**  
**(G)** The  $^1\text{H}$ - $^1\text{H}$  COSY spectrum of **5**

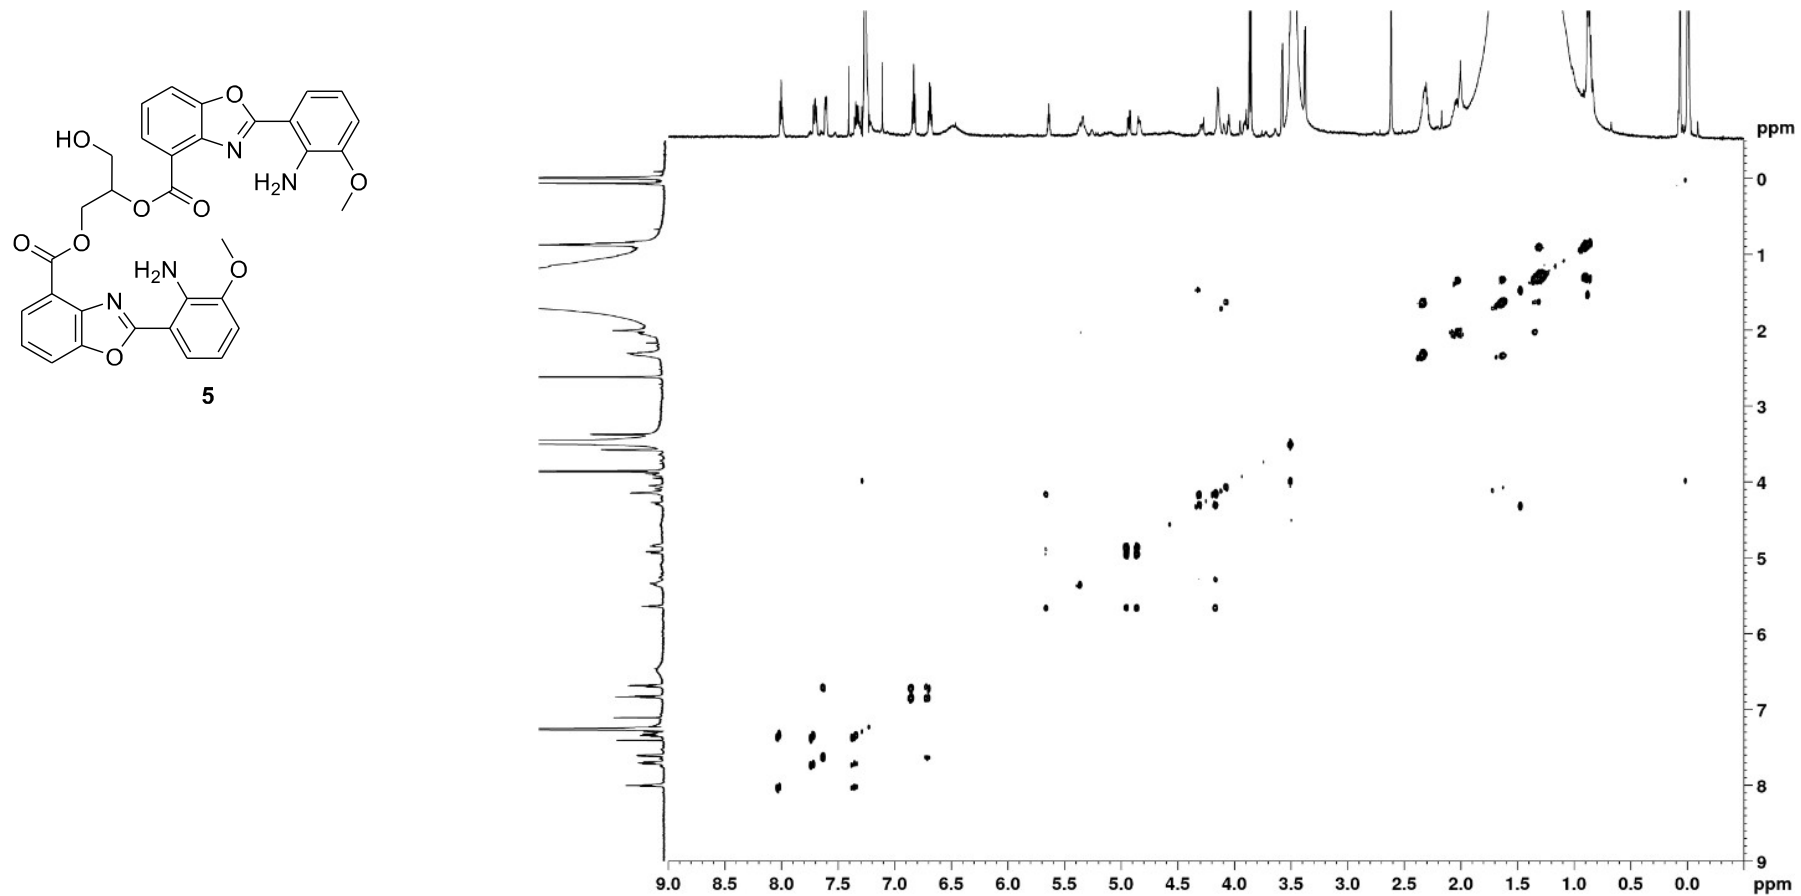

**Figure S7.** The spectroscopic data of **6**

(A) The HRESIMS (a) UV (b) spectrum of **6**

(a)

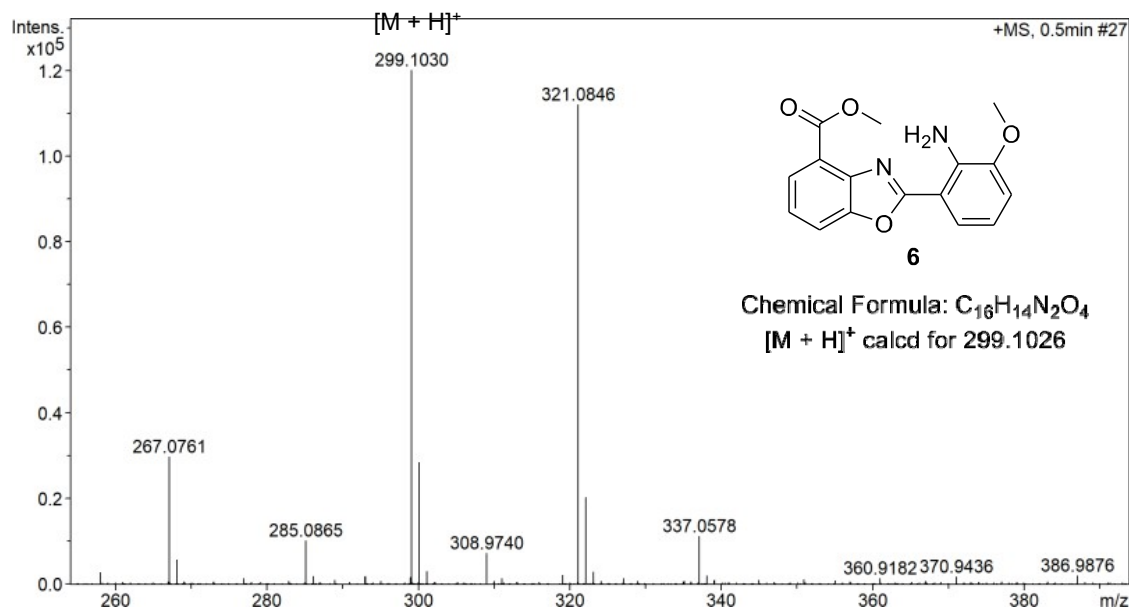

(b)

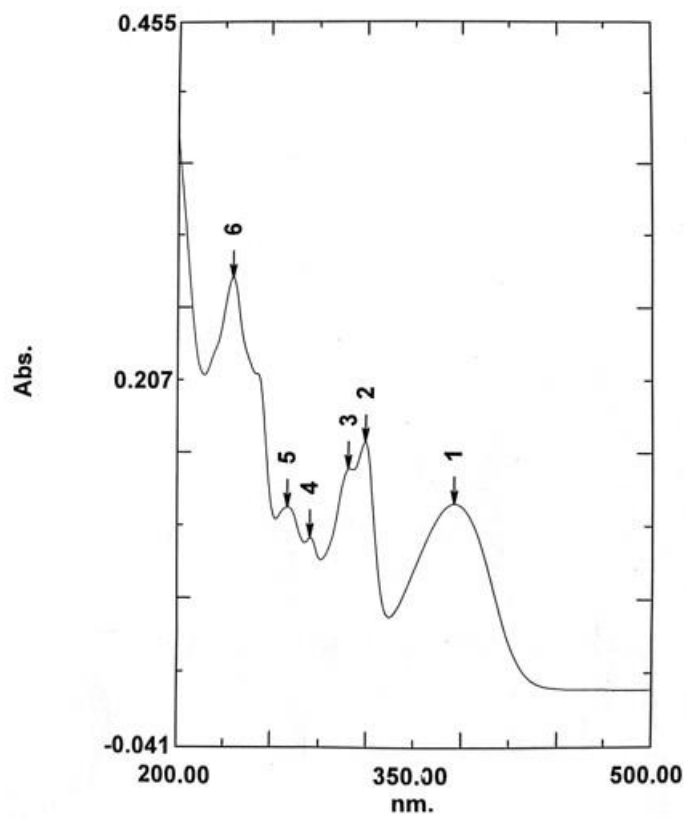

**Figure S7.** The spectroscopic data of **6**

(B) The  $^1\text{H}$ -NMR spectrum of **6** (700 MHz for  $^1\text{H}$  NMR in  $\text{CDCl}_3$ )

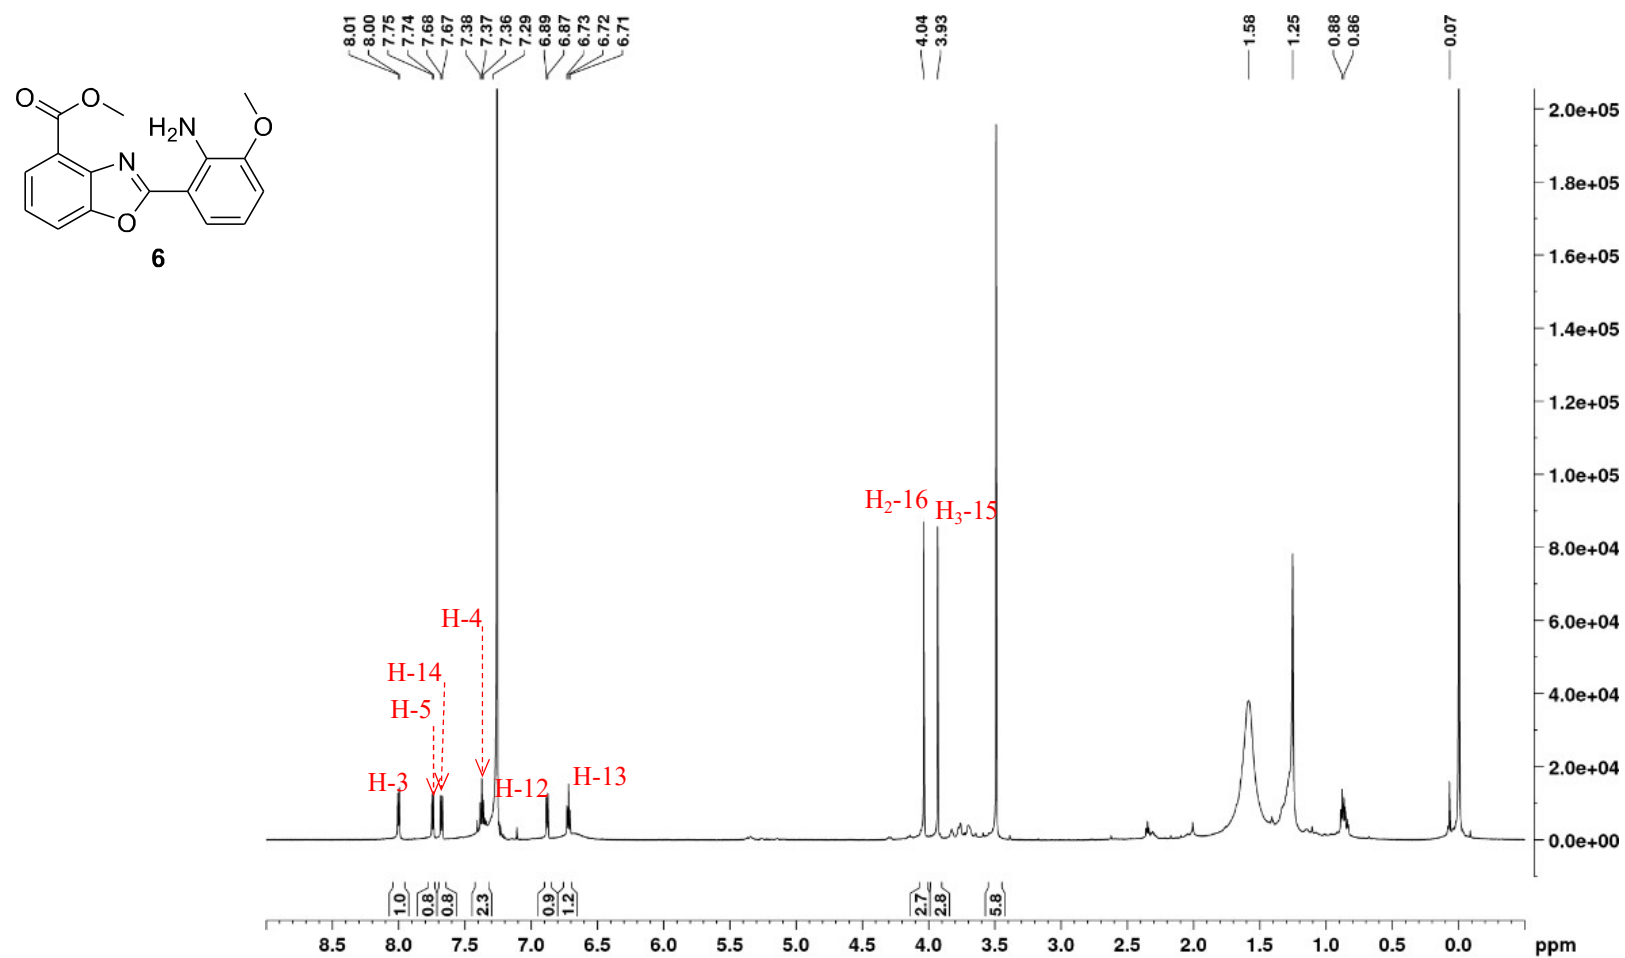

**Figure S7.** The spectroscopic data of **6**  
(C) The  $^{13}\text{C}$ -NMR spectrum of compound **6** in  $\text{CDCl}_3$  (175 MHz)

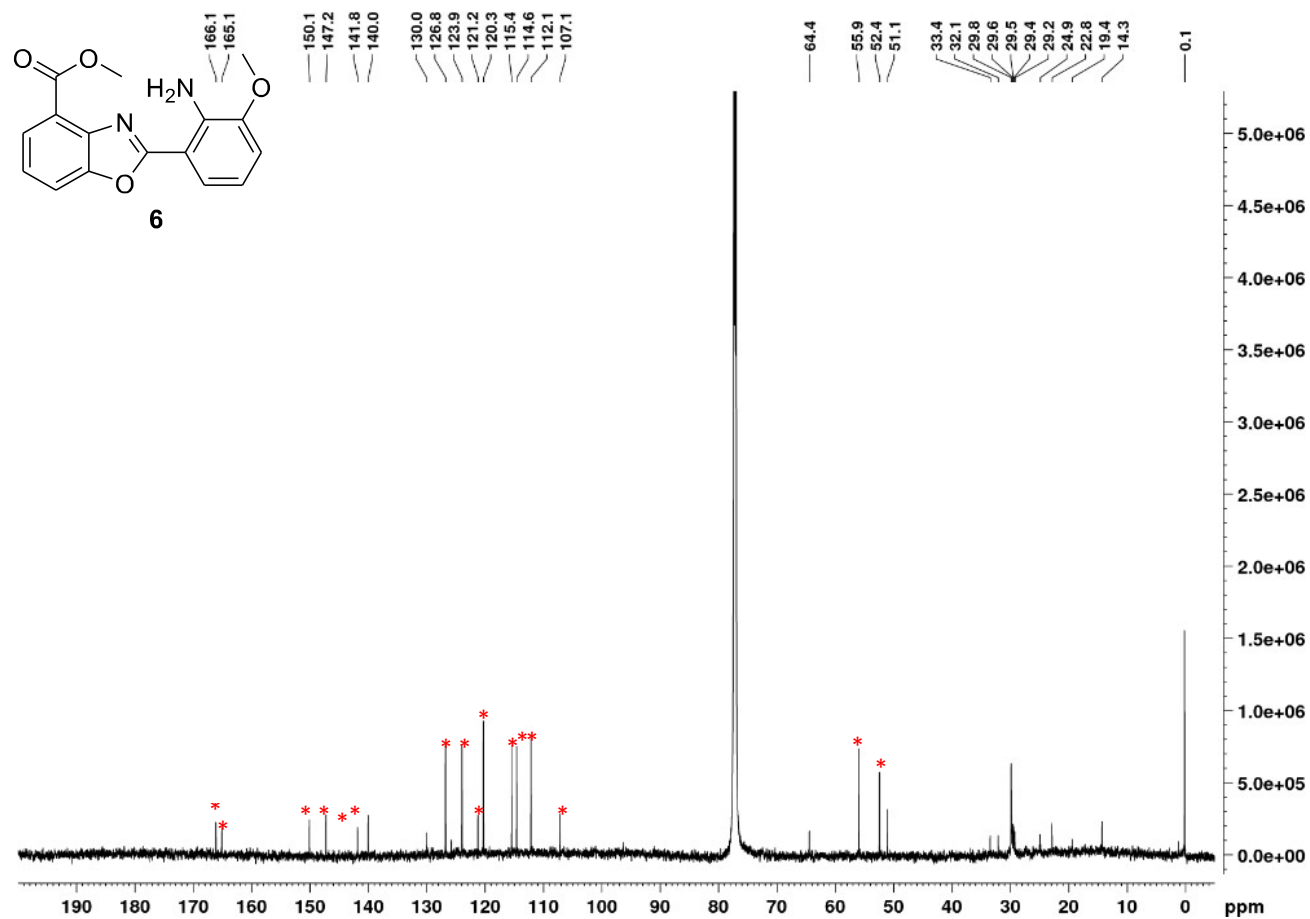

**Figure S7.** The spectroscopic data of **6**  
**(D)** The DEPT135 spectrum of **6**

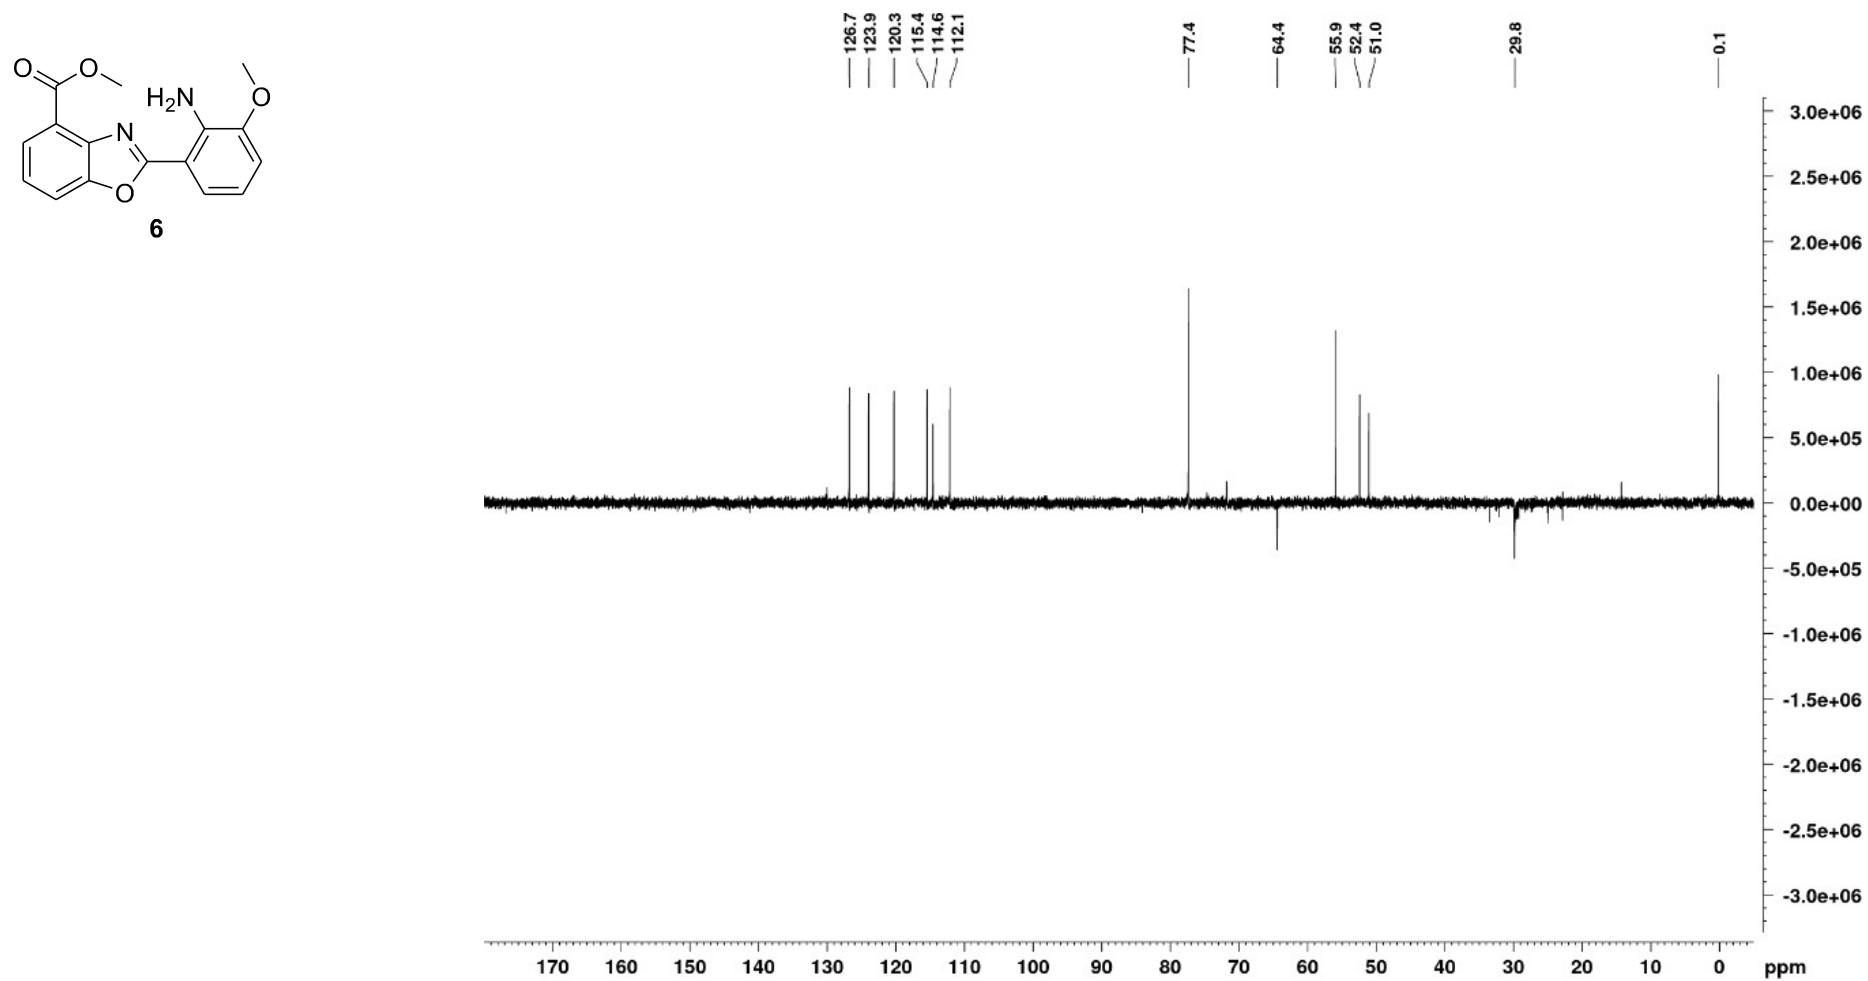



**Figure S7.** The spectroscopic data of **6**  
**(E)** The HSQC spectrum of compound **6**

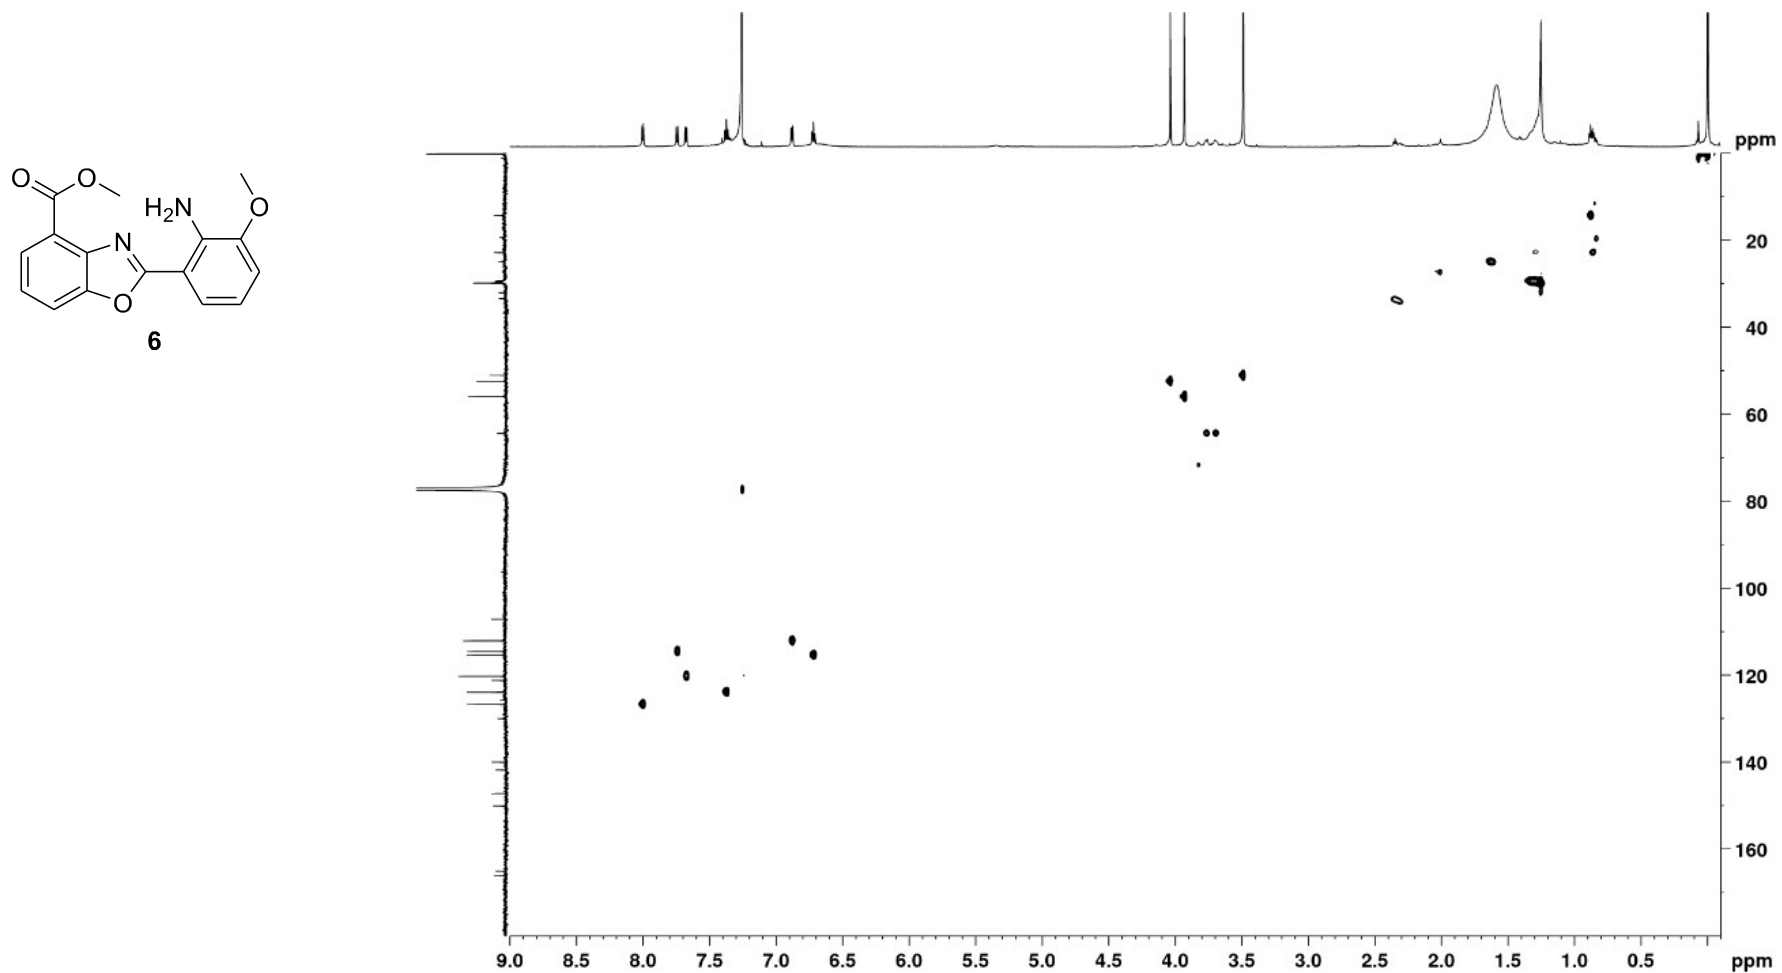

**Figure S7.** The spectroscopic data of **6**

**(F)** The HMBC spectrum of **6**

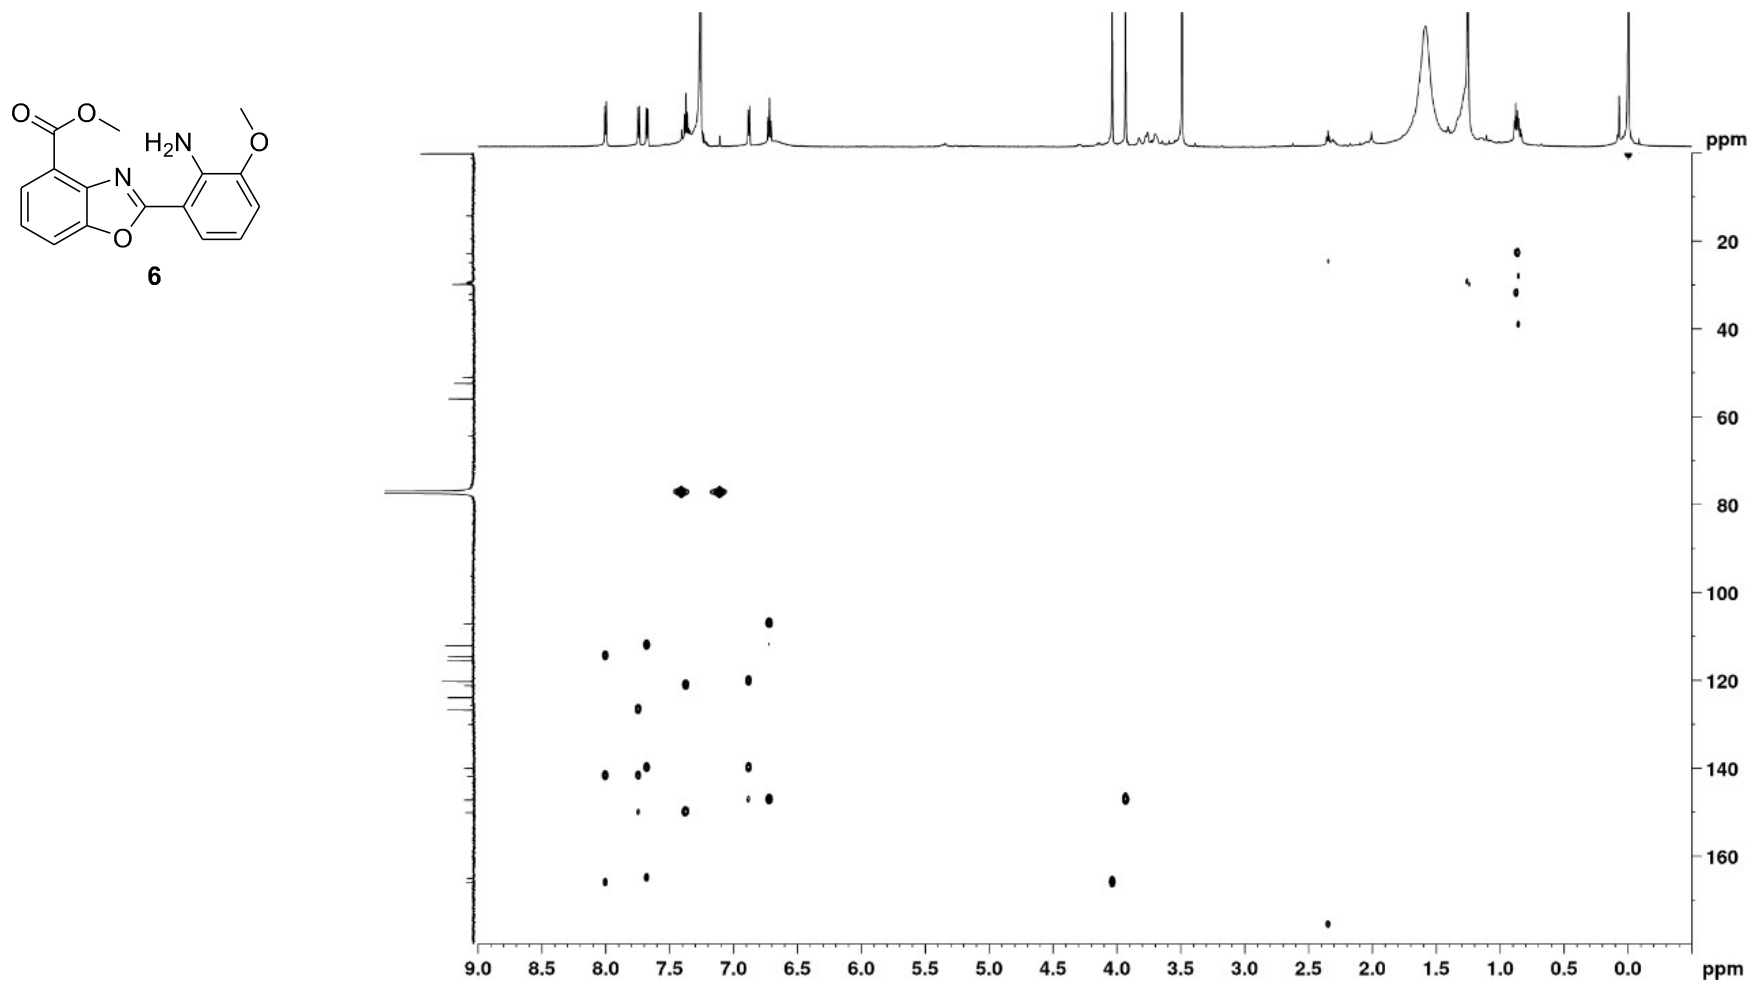

**Figure S7.** The spectroscopic data of **6**  
**(G)** The  $^1\text{H}$ - $^1\text{H}$  COSY spectrum of **6**

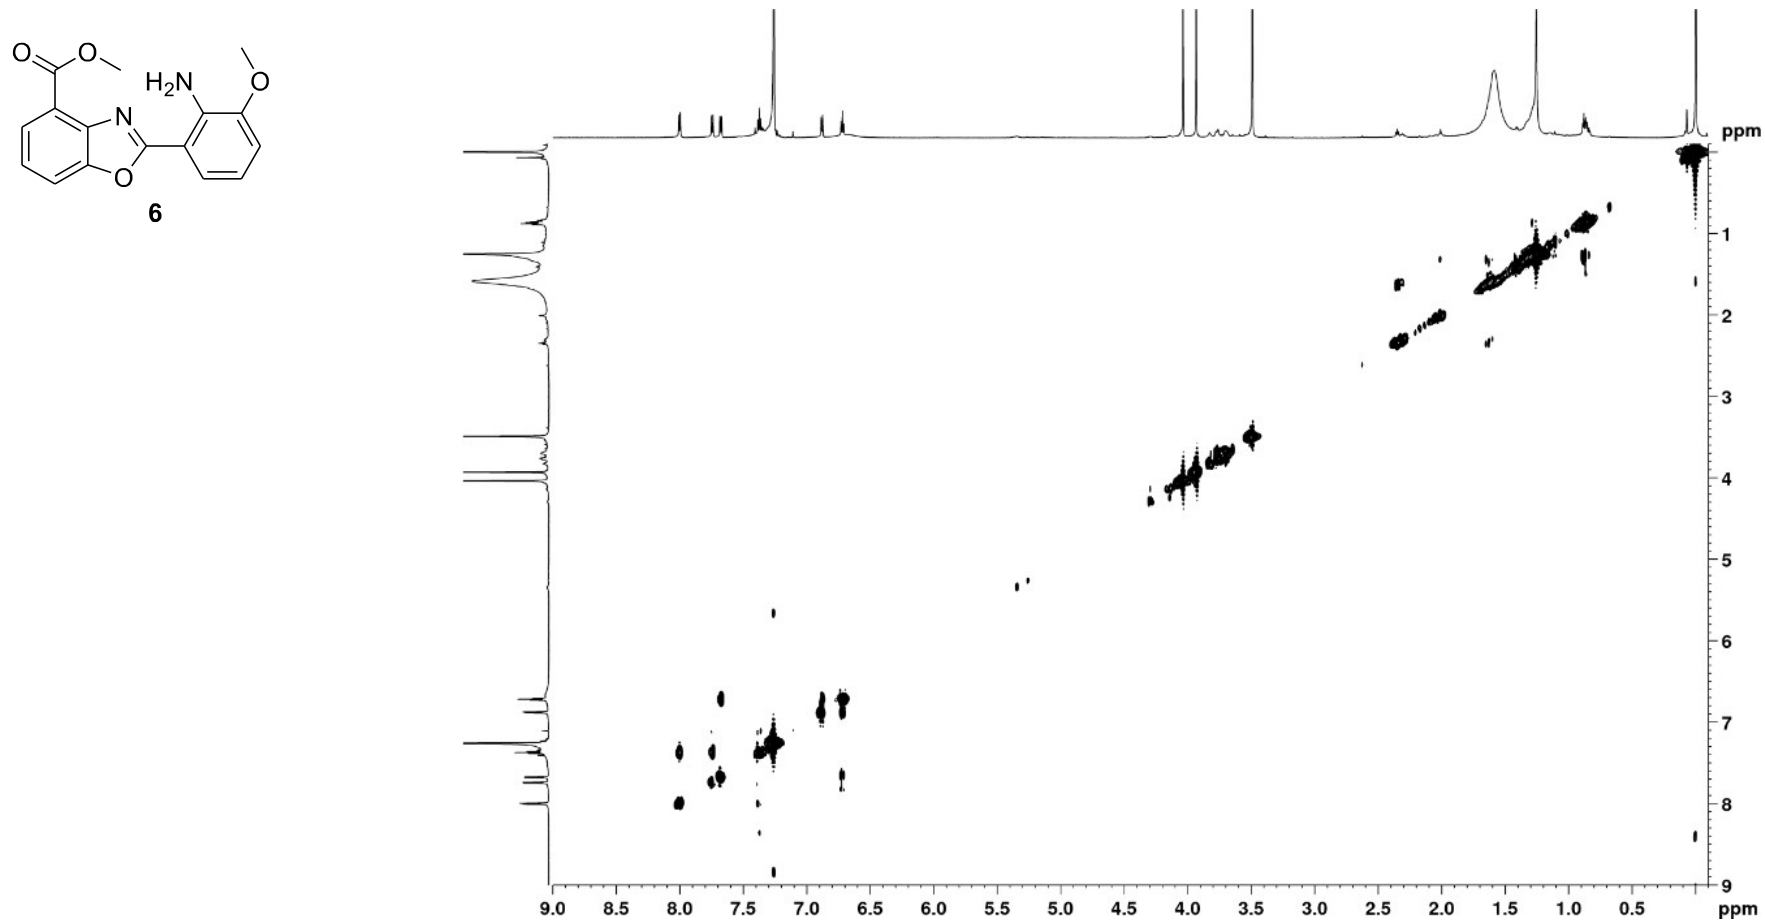

## References

1. Flett, F.; Mersinias, V.; Smith, C. P., High efficiency intergeneric conjugal transfer of plasmid DNA from *Escherichia coli* to methyl DNA-restricting *streptomycetes*. *FEMS Microbiol Lett* **1997**, 155 (2), 223-229.
2. Zaburannyi, N.; Rabyk, M.; Ostash, B.; Fedorenko, V.; Luzhetskyy, A., Insights into naturally minimised *Streptomyces albus* J1074 genome. *Bmc Genomics* **2014**, 15:97.
3. Myronovskyi, M.; Rosenkranzer, B.; Nadmid, S.; Pujic, P.; Normand, P.; Luzhetskyy, A., Generation of a cluster-free *Streptomyces albus* chassis strains for improved heterologous expression of secondary metabolite clusters. *Metab Eng* **2018**, 49, 316-324.
4. Huang, S.; Li, N.; Zhou, J.; He, J., Construction of a new bacterial artificial chromosome (BAC) vector for cloning of large DNA fragments and heterologous expression in *Streptomyces*. *Wei Sheng Wu Xue Bao* **2012**, 52 (1), 30-37.
